# **Beyond BRCA: Discovery of novel causes and consequences of homologous recombination deficiencies**

Daniel J. McGrail<sup>1,2#</sup>, Yang Li<sup>3&</sup>, Roger S. Smith<sup>4,5,6,7&</sup>, Bin Feng<sup>8</sup>, Hui Dai<sup>9</sup>, Yongsheng Li<sup>9,10</sup>, Limei Hu<sup>9</sup>, Briana Dennehey<sup>3</sup>, Sharad Awasthi<sup>3</sup>, Marc L. Mendillo<sup>4,5,6</sup>, Gordon B. Mills<sup>11</sup>, Shiaw-Yih Lin<sup>9</sup>, S. Stephen Yi<sup>10,12#</sup>, and Nidhi Sahni<sup>3,13,14#§</sup>

<sup>1</sup>Center for Immunotherapy and Precision Immuno-Oncology, Cleveland Clinic, Cleveland, OH, 44106, USA.

<sup>2</sup>Lerner Research Institute, Cleveland Clinic, Cleveland, OH 44106, USA.

<sup>3</sup>Department of Epigenetics and Molecular Carcinogenesis, The University of Texas MD Anderson Cancer Center, Houston, TX 77054, USA

<sup>4</sup>Department of Biochemistry and Molecular Genetics, Northwestern University Feinberg School of Medicine, Chicago, IL 60611, USA.

<sup>5</sup>Simpson Querrey Center for Epigenetics, Northwestern University Feinberg School of Medicine, Chicago, IL 60611, USA.

<sup>6</sup>Robert H. Lurie Comprehensive Cancer Center, Northwestern University Feinberg School of Medicine, Chicago, IL 60611, USA.

<sup>7</sup>Medical Scientist Training Program, Northwestern University Feinberg School of Medicine, Chicago, IL 60611, USA.

<sup>8</sup>GSK Oncology Experimental Medicine Unit, Waltham, MA 02451, USA

<sup>9</sup>Department of Systems Biology, The University of Texas MD Anderson Cancer Center, Houston, TX 77030, USA

<sup>10</sup>Livestrong Cancer Institutes, Department of Oncology, Dell Medical School, The University of Texas at Austin, Austin, TX 78712, USA

<sup>11</sup>Department of Cell, Development and Cancer Biology, Knight Cancer Institute, Oregon Health and Sciences University, Portland, OR 97201, USA

<sup>12</sup>Department of Biomedical Engineering, and Oden Institute for Computational Engineering & Sciences, The University of Texas at Austin, Austin, TX 78712, USA

<sup>13</sup>Program in Quantitative and Computational Biosciences (QCB), Baylor College of Medicine, Houston, TX 77030, USA

<sup>14</sup>Department of Bioinformatics and Computational Biology, The University of Texas MD Anderson Cancer Center, Houston, TX 77030, USA

<sup>&</sup>Contributed equally

<sup>§</sup>Lead contact

<sup>#</sup>Correspondence to [mcgraid@ccf.org](mailto:mcgraid@ccf.org), [stephen.yi@austin.utexas.edu](mailto:stephen.yi@austin.utexas.edu) or [nsahni@mdanderson.org](mailto:nsahni@mdanderson.org)

35

36 Keywords: Homologous recombination, DNA damage, breast cancer, hereditary cancer, network

37 biology, PARP inhibitors

## 38 SUMMARY

39 Since the discovery of *BRCA1* and *BRCA2* mutations as cancer risk factors, we have gained  
40 substantial insight into their role in maintaining genomic stability through homologous  
41 recombination (HR) DNA repair. However, upon pan-cancer analysis of tumors from The Cancer  
42 Genome Atlas (TCGA), we found that mutations in *BRCA1/2* and other classical HR genes only  
43 identified 10-20% of tumors that display genomic evidence of HR deficiency (HRD), suggesting  
44 that the cause of the vast majority of HR defects in tumors is unknown. As HRD both predisposes  
45 individuals to cancer development and leads to therapeutic vulnerabilities, it is critical to define  
46 the spectrum of genetic events that drive HRD. Here, we employed a network-based approach  
47 leveraging the abundance of molecular characterization data from TCGA to identify novel drivers  
48 of HRD. We discovered that over half of putative genes driving HRD originated outside of  
49 canonical DNA damage response genes, with a particular enrichment for RNA binding protein  
50 (RBP)-encoding genes. These novel drivers of HRD were cross-validated using an independent  
51 ICGC cohort, and were enriched in GWAS loci associated with cancer risk. Experimental  
52 approaches validated over 90% of our predictions in a panel of 50 genes tested by siRNA and 31  
53 additional engineered mutations identified from TCGA patient tumors. Moreover, genetic  
54 suppression of identified RBPs or pharmacological inhibition of RBPs induced PARP inhibition.  
55 Further mechanistic studies indicate that some RBPs are recruited to sites of DNA damage to  
56 facilitate repair, whereas others control the expression of canonical HR genes. Overall, this study  
57 greatly expands the repertoire of known drivers of HRD and their contributions to DNA damage  
58 repair, which has implications for not only future mechanistic studies, but also for genetic  
59 screening and therapy stratification.

60 **HIGHLIGHTS**

- 61       • The majority of HR deficiencies detected cannot be directly attributed to aberrations in  
62       canonical HR genes.
- 63       • Integrated network analysis identifies RNA binding proteins (RBPs) as a novel driver of  
64       HR deficiency in patient tumors.
- 65       • RBP dysfunction can produce HR deficiencies through both dysregulation of canonical HR  
66       genes and action at sites of DNA damage.

## 67 INTRODUCTION

68 Genomic instability is a hallmark of cancer (Hanahan and Weinberg, 2011), with implications both  
69 for treatment strategies as well as cancer screening and prevention. As normal healthy cells have  
70 largely intact DNA damage response (DDR) pathways, therapeutic avenues that selectively target  
71 tumor cells with DNA repair defects have emerged as a promising treatment strategy (Pilié et al.,  
72 2018). For instance, Poly (ADP-ribose) polymerase (PARP) inhibitors have emerged as a powerful  
73 approach to treat patients with defects in *BRCA1* or *BRCA2*, genes involved in homologous  
74 recombination (HR) repair, a process that faithfully repairs DNA double strand breaks (DSBs)  
75 (Brown et al., 2016; Livraghi and Garber, 2015; Pilié et al., 2018). Similarly, microsatellite  
76 instability, caused by defects in DNA mismatch repair (MMR), was recently approved as a  
77 biomarker for response to immune checkpoint blockade, marking the first approval of tumor type  
78 agnostic biomarker by the U.S. Food and Drug Administration (FDA) (Lemery et al., 2017).

79

80 Although these DNA repair defects in either the HR or MMR pathways may provide treatment  
81 options, non-functional variants of *BRCA1/BRCA2* or genes involved in the MMR pathway are  
82 also primary drivers in familial cancers (Garber and Offit, 2005). A large fraction (50%) of known  
83 drivers of hereditary cancers are genes involved in DNA repair and genome maintenance (Garber  
84 and Offit, 2005). In the case of breast cancer, women with a mother, sister, or daughter with breast  
85 cancer have a two-fold higher risk of developing breast cancer (Beral et al., 2001); however, only  
86 15-25% of patients with hereditary breast/ovarian cancers have *BRCA1* or *BRCA2* mutations and  
87 the majority of hereditary drivers have not yet been identified (Couch et al., 2014; Nielsen et al.,  
88 2016). Incomplete knowledge of genetic risk factors hinders approaches for effective cancer  
89 screening and prevention. A better understanding of these genetic risks could identify which

90 patients require more aggressive risk reduction approaches, and minimize use of aggressive risk  
91 reduction interventions in patients who lack pre-disposition genes (Nelson et al., 2014).

92

93 Thus, there exists a critical need to understand molecular alterations associated with genomic  
94 instability and the specific genes that can drive DNA repair defects. In order to comprehensively  
95 identify tumors with HR defects, we utilized a genomic scar HRD score. This score allows us to  
96 detect genomic lesions left by HRD and identify tumors with HRD regardless of the genetic event  
97 which caused the HRD (Telli et al., 2016). HRD scores calculated across tumors from The Cancer  
98 Genome Atlas (TCGA) revealed numerous molecular alterations associated with HRD.  
99 Surprisingly, approximately 75% of tumors that scored positive for HRD exhibited no known  
100 molecular HRD driver. Using an integrated network-based approach, we identified nearly 100  
101 novel candidate HRD drivers, with a particular enrichment for genes involved in RNA processing.  
102 Candidate HRD drivers had over a 90% experimental validation rate. Mechanistic studies indicated  
103 that that the RNA binding proteins we identified may influence HR either by modulating  
104 expression of canonical DNA repair genes, or by directly acting directly at sites of DNA damage.

105

## 106 **RESULTS**

### 107 **HRD scores vary across tumor types and patient demographics.**

108 HRD leaves a quantifiable genomic scar allowing the calculation of an HRD score, defined as the  
109 combination of three measures of genomic instability: loss of heterozygosity (LOH), telomeric  
110 allelic imbalance (TAI), and large-scale transitions (LST) (Fig. 1A) (Telli et al., 2016). We  
111 determined the HRD score across tumors from all patients within TCGA, and found high HRD  
112 scores for basal-like breast cancer and ovarian cancer, both of which are known to have high levels

113 of HRD (Couch et al., 2014; Konstantinopoulos et al., 2015). Luminal androgen receptor, and  
114 luminal A and luminal B breast cancers had low HRD scores (Fig. S1A-B). In addition to basal-  
115 like/ovarian cancer, numerous other cancer types not typically associated with HRD exhibited high  
116 HRD scores, including lung squamous carcinoma (LUSC), bladder cancer (BLCA), and gastric  
117 cancer (STAD) (Fig. 1B). Consistent with early onset of basal/triple-negative breast cancers  
118 (TNBC), we found that in tumors from basal breast patients, HRD score was negatively associated  
119 with patient age. There were similar trends observed in lung adenocarcinoma (LUAD), head and  
120 neck squamous carcinoma (HNSC), and mesothelioma (MESO). Nonetheless, when quantified  
121 across all patients, HRD score generally showed a positive relationship with age ( $P = 5.3 \times 10^{-7}$ ,  
122 Fig. 1B, Fig. S1C). When compared across all cancer types, tumors from male patients tended to  
123 have higher HRD scores than female patients ( $P = 0.04$ , Fig. 1B, Fig. S1D), and tumors from Asian  
124 patients had statistically higher HRD scores than other patients ( $P = 4.3 \times 10^{-3}$ , Fig. 1B, Fig. S1E-  
125 F).

126

127 **HRD scores are associated with suppression of cell death pathways and activation of DNA**  
128 **damage response checkpoints.**

129 To begin to define the molecular changes associated with HRD across cancer types, we performed  
130 gene set enrichment analysis (GSEA) (Subramanian et al., 2005) and found that HRD scores were  
131 associated with increased expression of cell cycle checkpoint genes and decreased expression of  
132 genes associated with caspase activation (Fig. 1C). As shown in Fig. 1D, protein-level analysis  
133 using reverse phase protein array (RPPA) data indicated HRD score was positively associated with  
134 numerous cell cycle regulators, including the DNA damage checkpoint marker phospho-CHK2,  
135 as well as MSH6 previously implicated non-homologous end-joining outside of its canonical role

136 in DNA mismatch repair (Shahi et al., 2011). We confirmed the association of HRD score with an  
137 increased expression of cell cycle checkpoint proteins in breast tumors using an orthogonal whole-  
138 proteome mass spectrometry-based dataset (Fig. 1E) (Mertins et al., 2016). Analysis of  
139 microRNAs (miRNAs) again identified numerous miRNAs associated with HRD score (Fig. 1F).  
140 We desired to assess which pathways these miRNAs might modulate, but the analysis was  
141 complicated: each miRNA can target multiple genes and each gene can be targeted by multiple  
142 miRNAs. To address this complication, we calculated a gene-wise miRNA suppression score for  
143 each gene, defined as the sum of the miRNA coefficients predicted to target each specific gene.  
144 Final miRNA scores for all genes were used for GSEA. We found that miRNAs associated with  
145 high HRD scores preferentially suppressed oncogene-induced senescence and apoptotic pathways  
146 (Fig. 1G). Taken together, these results indicate that HRD positive tumors tend to have suppressed  
147 tumor suppressor pathways and activated DNA damage checkpoint pathways.

148

#### 149 **The majority of HRD are of unknown aetiology.**

150 In order to bifurcate tumors into HRD positive and HRD negative groups, we took a multi-step  
151 approach. We began by analyzing tumors of patients with known deleterious *BRCA1* or *BRCA2*  
152 germline mutations as a gold standard for HRD positivity. We focused this analysis across breast,  
153 ovarian, pancreatic, and prostate cancer where *BRCA1* or *BRCA2* germline mutations are known  
154 to promote tumorigenesis. As indicated by the receiver-operator characteristic curve in Figure 2A,  
155 HRD score was highly accurate at recovering tumors with deleterious *BRCA1* or *BRCA2* germline  
156 mutations, demonstrated by an area under the curve (AUC) value of 0.83. Using this data, we  
157 determined an optimal HRD threshold score of 32, which identified numerous HRD positive  
158 tumors across an array of different cancer types (Fig. 2B). However, an analysis of the genetic



159 events within these tumors indicated that only a small minority (9.7%) displayed alterations  
160 (mutation or methylation) in *BRCA1/BRCA2*. Therefore, we expanded the analysis of genetic  
161 events to include HR associated genes from a larger, annotated list (Lord and Ashworth, 2016) but  
162 could still only identify potential drivers for roughly 25% of HRD tumors (Fig. 2C).

163

164 The large fraction of HRD positive tumors with causes that could not be attributed to known drivers  
165 of HRD may represent false positives, or alternatively, could indicate that the majority of drivers  
166 of HRD in patients with cancer are unknown. Based on the strong molecular alterations we  
167 observed to be associated with HRD (Fig. 1C-G), we hypothesized that if the HRD of unknown  
168 origin were due to true HRD, they would exhibit similar molecular changes to those caused by  
169 known drivers such as *BRCA1/BRCA2*. Analysis of GSEA scores from gene expression data were  
170 correlated for two groups: 1) DDR-driven HRD-positive tumors vs. HR-competent tumors, and 2)  
171 HRD tumors with unknown causes vs. HR-competent tumors. Both groups demonstrated  
172 remarkably concordant changes in gene expression (Fig. 2D). Likewise, correlation analysis  
173 performed at the protein level using RPPA data also revealed a robust correlation between protein  
174 alterations in HRD positive tumors with known DDR gene alterations and those of unknown origin  
175 (Fig. 2E). These data indicate that a large fraction of HRD positive tumors are driven by unknown  
176 causes.

177

### 178 **Network-based discovery of novel drivers of HRD.**

179 Across all tumor types, approximately 75% of HRD positive tumors had an intact complement of  
180 known HR-related genes, indicating that the majority of HRD drivers were of unknown aetiology  
181 (Fig. 3A). To define the causes of HRD in these tumors, we developed a network-based algorithm

182 for identifying novel drivers of HRD (Fig. 3B). We began with a list of verified inducers of HRD.  
183 Then we identified genetic events in the genes encoding these inducers in patient tumors. Tumors  
184 were considered to have a genetic event if they had either: 1) mutations with high variant allele  
185 frequency (VAF), or 2) a methylation event that corresponded with downregulation of the  
186 methylated gene. VAF was used for assessment because if a mutation is driving  
187 HRD/tumorigenesis, then it should occur in the majority of tumor cells. Next, we assessed whether  
188 a genetic event was associated with an increased HRD score based on cancer type. Candidate  
189 genetic events that may drive HRD in an individual tumor were assigned based on the degree to  
190 which that event increased the HRD score, the number of tumors in which it occurred, and the  
191 VAF of the mutation in a given tumor. After assigning the genetic events that may cause HRD to  
192 an individual tumor, we hypothesized that proteins that interact with these drivers would also be  
193 more likely to cause HRD. Therefore, we used protein-protein interaction (PPI) networks to  
194 expand the list of candidate HRD drivers. This prediction algorithm was iterated until convergence,  
195 when it could no longer identify additional putative novel HRD driver candidates.

196

197 The final network of predicted HRD drivers (Fig. 3C) could be grouped into three, large protein  
198 modules. As anticipated, the largest of these was a DNA damage module, followed by an RNA  
199 binding protein (RBP) module, and a smaller protein translation module. Only a small fraction of  
200 proteins (< 3%) was not strongly associated with any one of these modules. In total, we identified  
201 novel HRD drivers for 626 of 1296 patient tumors displaying HRD but lacking a discernable  
202 alteration in a previously defined HR pathway (unexplained HRD), with the largest fraction  
203 consisting of RBP genes (Fig. 3D). Identified HRD causes and ontology annotations for each  
204 tumor are given in Table S1. Tumors that we failed to identify a putative driver for exhibited

205 significantly lower ( $P = 5 \times 10^{-11}$ ) HRD scores, suggesting these samples may be enriched for false  
206 positives. The relative proportion of various HRD drivers varied across tumor types. Ovarian,  
207 bladder, and colorectal cancers showed the largest fractions driven by canonical DDR genes,  
208 whereas melanoma, lung adenocarcinoma, and pancreatic cancer, showed the largest fractions  
209 driven by RBP genes (Fig. 3E). Notably, tumors from men were more likely to have HRD driven  
210 by RBP mutations (Fig. 3F). The majority of patients with bladder cancer in the TCGA cohort  
211 received cisplatin or similar chemotherapies, and should respond favorably if the tumor is HRD.  
212 We found that all identified causes of HRD were associated with good prognosis in bladder cancer,  
213 indicating the identified HRD drivers likely contribute to HRD and thus chemosensitivity (Fig.  
214 S2). When we analyzed the remaining HRD positive tumors with unexplained HRD, we identified  
215 several miRNAs that could suppress the expression of HRD drivers that were up-regulated in HRD  
216 positive sarcoma tumors (Fig. S3).

217

### 218 **Functional validation of novel drivers of HRD.**

219 We next sought to validate that the novel putative drivers of HRD identified from patient tumors  
220 were functionally important in HR and not simply bystander events. To begin to validate the  
221 functional relevance of candidate genes, we began by utilizing the DR-GFP reporter assay. In this  
222 assay, expression of an eGFP variant can only be restored if it is accurately repaired by HR  
223 following cleavage with I-SceI (Pierce et al., 1999). Pladienolide B, which inhibits the core  
224 spliceosome RBP SF3B1, significantly inhibited HR at concentrations as low as 1 nM in U2OS  
225 cells, suppressing HR comparable to inhibition of the Mre11-Rad50-Nbs1 complex critical for HR  
226 (Ciccia and Elledge, 2010) with 100  $\mu$ M Mirin (Fig. S4A). For more specific analysis, we utilized  
227 two independent siRNAs for 43 of the potential HRD mediators we identified, and found that 95%

228 induced HR defects (Fig. 4A). The two genes that failed to induce HR defects, *CEP72* and *JMJD6*,  
229 were both classified as “other.” The genes in this category were only weakly linked to any module,  
230 further indicating that our network-based approach increased the robustness of our ability to  
231 identify strong candidate drivers. To exclude the potential that reduced HR function is merely an  
232 artifact from arresting cell cycle, we analyzed the ability of cells to form irradiation (IR)-induced  
233 Rad51 foci specifically in cycling cells following suppression of candidate RBPs, revealing highly  
234 concordant results (Fig. S4B-C). A complete summary of the results of functional assays are given  
235 in Table S2. As depletion of RBP proteins may not be functionally equivalent to the effects of  
236 missense mutations, we engineered vectors expressing RBPs with mutations identified from HRD  
237 tumors. Cells were transiently transfected with RFP-tagged mutant proteins or wild-type controls,  
238 allowing for analysis of HR function in cells expressing the desired constructs. After we profiled  
239 29 mutations derived from patient tumors across 10 genes, we found that 28/29 inhibited HR  
240 function (Fig. 4B).

241  
242 To further validate the role of RBPs in HR, we treated TNBC MDA-MB-231 cells with  
243 pladienolide B, and found that it efficiently inhibited the formation of IR-induced Rad51 foci in  
244 cycling cells (Fig. 5A-B). As PARP inhibitors are known to preferentially kill HRD cells, we  
245 hypothesized that the RNA spliceosome inhibitor pladienolide B would sensitize these cells to  
246 PARP inhibitors. Indeed, we found pladienolide B and the PARP inhibitor BMN-673  
247 demonstrated synergy in two TNBC cell lines, MDA-MB-231 (Fig. 5C) and BT-549 (Fig. 5D).  
248 For more specific analysis, we repeated the IR induced Rad51 foci assay following siRNA-  
249 mediated depletion of *DDX3X* and *AQR*, two of the most common mutant RBPs in TNBC. We  
250 found that both si*DDX3X* and si*AQR* both inhibited foci formation across 4 TNBC cell lines (Fig.

251 5E). We further validated that suppression of AQR likewise suppressed HR in ovarian cancer cells,  
252 where it was also predicted to be associated with HR function (Fig. S4D). As HR deficient tumors  
253 may be therapeutically targeted with PARP inhibitors, we next tested the effects of PARP  
254 inhibitors in MDA-MB-231 cells stably expressing shDDX3X, shSF3B3, or shBRCA2. We found  
255 that depletion of either of the RBPs DDX3X or SF3B3 increased cell sensitivity to the PARP  
256 inhibitors BMN-673 (Fig. 5F) and AZD2281 (Fig. 5G) as well as if not better than depletion of  
257 BRCA2. Long-term clonogenic assays performed in the presence of BMN-673 confirmed this  
258 increased sensitivity to PARP inhibition (Fig. 5H). Together, these results indicate that the novel  
259 HRD drivers we identified are likely to be functionally relevant for HR repair across multiple cell  
260 lines and assays.

261

262 **Induction of HR defects may occur by modulation of DDR genes as well as independent**  
263 **pathways.**

264 Next, we sought to understand how the newly identified novel drivers of HRD might influence HR  
265 repair. We hypothesized that loss of RBPs could interfere with DDR gene expression, by either  
266 decreasing mRNA stability or by interfering with splicing, either of which could result in hindered  
267 protein function. To test whether RBPs were modulating DDR genes, we performed multiple  
268 experimental and computational analyses. First, RNAseq analysis following siRNA-mediated  
269 depletion of 17 RBPs in three cell lines to identify differential DDR gene expression relative to  
270 either siCTRL, or siBRCA1/siBRCA2. Next, TCGA patient tumors were analyzed to detect  
271 decreased DDR gene expression relative to HR competent tumors or tumors with HRD caused by  
272 DDR genes. Finally, the same comparisons were made using TCGA alternative splicing analysis  
273 rather than gene expression levels. All comparisons were made to both siCTRL/HR competent

274 samples and siDDR/HRD caused by DDR, as we had found that HRD itself can cause  
275 transcriptional rewiring (Fig. 1C, 2D). The integration of these results is shown in Fig. 6A, with  
276 specific comparisons shown in Fig. S5. We identified DDR genes that were either suppressed or  
277 alternatively spliced for 55% (26 out of 47) of the RBPs that are candidates for affecting HR. The  
278 largest influence on gene expression was seen for members of the mediator complex (75% of  
279 genes), followed by core spliceosome members (61% of genes), with less influence seen by other  
280 RNA binding proteins (36% of genes). We validated 10 proteins identified to be modulated at the  
281 gene expression level by 3 RBPs at the protein level by western blot, and found all candidates  
282 showed lower levels of protein as expected (Fig. S5G-I).

283

284 For those RBPs that did not appear to be directly modulating expression of DDR genes, we  
285 hypothesized that they might act directly at sites of DNA damage. To evaluate whether RBPs  
286 might act at sites of damage, we tested whether the RBP SNRPE formed foci in response to IR-  
287 induced damage. Although at baseline SNRPE is largely nuclear, it is not tightly chromatin bound  
288 and most can be extracted (Fig. 6B). Within 1 hour after cells were irradiated, SNRPE became  
289 increasingly chromatin bound, and co-localized with the DNA DSB marker  $\gamma$ H2AX (Fig. 6C-D).  
290 Furthermore, cells over-expressing SNRPE demonstrated quicker DSB repair as quantified by  
291 quicker loss of  $\gamma$ H2AX foci (Fig. 6E).

292

293 Based on the ability of RBPs to modulate expression of DDR genes, we hypothesized that a similar  
294 paradigm may apply to mutations in genes regulating translation by altering protein levels of DDR  
295 proteins. However, our analysis of TCGA RPPA data for DDR proteins revealed no significant  
296 relationships between mutations in translation genes, such as E4F1, and decreased DDR protein

297 expression (Fig. S6A-B). Nonetheless, as observed for SNRPE, we were able to detect IR-induced  
298 E4F1 foci (Fig. S6C), suggesting that E4F1 might have a functional role at sites of DNA damage.

299

300 **Novel HR drivers generalize to independent cohorts and are associated with cancer risk.**

301 While complete validation of all novel HRD drivers would be time prohibitive, to evaluate whether  
302 the novel HR drivers we uncovered in the TCGA data might be more broadly applicable to patient  
303 tumors in general, we analyzed additional patient cohorts. Interrogation of the International Cancer  
304 Genome Consortium (ICGC) breast cancer patient cohort validated that mutations from all  
305 identified ontologies were significantly associated with higher HRD scores (Fig. 7A).  
306 Furthermore, RBP mutants accounted for a similar fraction of HRD tumors as that observed in the  
307 TCGA cohort (Fig. 7B, Fig. 3E). The association of HRD score with candidate drivers was  
308 maintained when analyzing TNBC tumor alone (Fig. 7C).

309

310 As loss of function in genes associated with HR is associated with increased propensity for cancer  
311 development, the genes we identified as candidate drivers of HRD should be enriched in genes  
312 associated with cancer risk in genome-wide association studies (GWAS). Therefore, we assembled  
313 all genes associated with cancer risk from GWAS DB (Li et al., 2016) and looked for the HRD  
314 drivers identified through our pipeline. Overall, we found that our identified HRD drivers were  
315 significantly enriched for genes associated with cancer risk (Fig. 7D). Analysis of individual gene  
316 ontology indicated that this enrichment was largely driven by DDR and RBP genes (Fig. 7E).  
317 Mutations in genes associated with cancer risk were detected across numerous cancer types (Fig.  
318 7F). These mutations, when occurring in the germline, could provide vital information for genetic  
319 counseling to improve cancer screening/prevention.

320

## 321 **DISCUSSION**

322 Our analysis of genomic scars indicative of HRD across tumors in the TCGA indicated that only  
323 about 25% of HRD could be attributed to alterations in known drivers of HRD. The remaining  
324 75% of HR-deficient tumors had no identifiable defects in known DDR genes. However, these  
325 tumors displayed gene and protein expression changes consistent with HRD caused by aberrations  
326 in DDR genes known to cause HRD, including activation of cell cycle checkpoints and suppression  
327 of senescence/apoptosis pathways. Suppression of senescence/apoptosis pathways may be critical  
328 for HRD tumor cells to circumvent tumor-suppressive DDR checkpoints (Bartkova et al., 2006),  
329 thus enabling genomically unstable cells to continue proliferating and acquire additional  
330 mutations. This transcriptional re-wiring may explain how tumor cells continue to proliferate in  
331 absence of *BRCA1/BRCA2*, whereas depletion of these genes in non-malignant cells often reduces  
332 cellular fitness. Using a networks-based approach, we more than doubled (from 462 to 1088) the  
333 number of tumors in TCGA with an attributable driver of HRD. Among the novel drivers, we  
334 found a particular enrichment for aberrations in genes encoding RNA binding proteins, which  
335 represented over half of newly identified drivers of HRD.

336

337 The potential role of RBPs in controlling HR is consistent with limited, previously published  
338 reports. For example, genome-wide siRNA depletion screens designed to evaluate HR function  
339 identified RBPs, namely *RBMX* (Adamson et al., 2012) and *CDC73* (Herr et al., 2015), as potential  
340 drivers of HRD. An orthogonal genome-wide screen for PARP inhibitor sensitivity using CRISPR-  
341 mediated deletion also recovered genes consistent with our results, including *SF3B3* and *SF3B5*  
342 (Zimmermann et al., 2018). However, *in vitro* screening approaches do not necessarily correspond



343 to *bona fide* drivers of HRD observed in patient tumors. Genes identified as critical for HR through  
344 loss of function screens might be essential genes, meaning loss is incompatible with cell viability,  
345 or may simply not be mutated at appreciable frequencies in human populations. Additionally, the  
346 deletion/depletion of genes may not reflect the phenotypes observed when those same genes are  
347 mutated. The disparity between *in vitro* data and observations in patient tumors is best highlighted  
348 by the two aforementioned siRNA screens that identified 6,137 (Adamson et al., 2012) and 10,050  
349 (Herr et al., 2015) genes that reduced HR function more than the average reduction observed  
350 following loss of canonical HR/BRCAness genes (Lord and Ashworth, 2016). In contrast, our  
351 study indicated that only 1.58% of the 6,137 genes and 1.04% of the 10,050 genes may be relevant  
352 in tumors from patients with cancer.

353

354 The genomic scar HRD score calculation and corresponding analyses performed in our study are  
355 subject to several limitations. The primary limitations are centered around the accuracy of the HRD  
356 score itself, as well as the chosen threshold for HRD positive and negative tumors. Although the  
357 combination of three different measures of genomic instability offers an improved signal over any  
358 single metric, it may still not capture all HRD tumors (Telli et al., 2016). Further, we assumed a  
359 constant threshold value for HRD positivity across all tumor types, but the validity of this  
360 assumption is unclear. At the molecular level, we observed consistent changes between HRD  
361 driven by canonical drivers and those with originally unidentified aetiology, suggesting that HRD  
362 score reflects loss of HR function in both contexts and that the HRD positive tumors of unidentified  
363 aetiology are not generally false positives. However, at the single tumor level the HRD score is  
364 still subject to false positives/negatives. For example, at the optimal threshold identified for  
365 bifurcation into HRD positive and negative tumors, roughly 20% of *BRCA1/BRCA2* germline

366 mutations were classified as existing in HR competent tumors. The observed false negative  
367 germline *BRCA1/BRCA2* mutations could represent actual false negatives, or may represent non-  
368 deleterious variants of *BRCA1/BRCA2*. By enforcing occurrence of genetic events in multiple  
369 tumors, we were largely able to avoid the effects of sporadic false positives, as evidenced by the  
370 over 90% experimental validation rate.

371

372 The findings presented in this study warrant follow up studies to further elucidate the mechanisms  
373 underlying how the newly identified drivers of HRD control HR repair. Previous reports have  
374 documented the role of RBPs in controlling expression of DDR factors, for example, RBMX has  
375 been shown to be required for *BRCA2* expression (Adamson et al., 2012). We likewise detected  
376 that 26 and 47 RBPs analyzed may suppress expression of canonical HR genes. Consistent with  
377 our observation that *ILF2* can modulate multiple DDR genes, *ILF2* overexpression facilitates  
378 expression of DDR genes leading to resistance to DNA damaging agents in 1q21-amplified  
379 multiple myeloma (Marchesini et al., 2017). Following DNA damage, the spliceosome has also  
380 been shown to undergo rapid mobilization resulting in alternative splicing that may facilitate repair  
381 of DNA lesions (Tresini et al., 2015). Although analysis of Rad51 foci formation indicates RBPs  
382 largely induce HR defects at or before Rad51 loading, future studies to elucidate precisely which  
383 step(s) of HR putative drivers of HR defects are responsible for are warranted. Alternatively, RBPs  
384 may not interact directly with HR proteins but interfere with generation of RNA species required  
385 for HR repair. For instance, recent work indicated that *DICER* and *DROSHA* RNA products are  
386 involved in activation of the DDR, and that DDR foci can be abrogated by RNase A-mediate RNA  
387 degradation (Francia et al., 2012). Alternatively, evidence exists that endogenous RNA transcripts  
388 may serve as templates for HR repair, and loss of RBPs may have a primary effect on these

389 template RNA molecules (Keskin et al., 2014). Furthermore, if RBP-deficient HR defective tumors  
390 utilize Rad52 for repair as has been documented following loss of canonical HR repair genes such  
391 BRCA1, BRCA2, PALB2, and RAD51C (Rossi et al., 2021). Further mechanistic insight into how  
392 RBPs and other novel HRD drivers modulate HR repair will advance our understanding of the  
393 diverse mechanisms used to promote genomic stability in human cells.

394

395 While PARP inhibitors are gaining FDA approval in a variety of contexts. However, they are most  
396 commonly used for treating breast and gynecological cancers, and most on-going PARP inhibitor  
397 clinical trials are performed within this context. Across TCGA, we found that men tended to have  
398 higher HRD scores, strongly observed in the context of chromophobe kidney cancer, acute myeloid  
399 leukemia, pancreatic cancer, head and neck squamous cell carcinoma, and esophageal carcinoma.  
400 It is possible that because these cancers are enriched for HRD driven by previously undocumented  
401 RBPs that are likely to drive HRD, men with these specific HRD positive cancers may constitute  
402 an understudied population. Loss of RBPs may promote sensitivity to PARPi directly via induction  
403 of HRD, through secondary mechanisms such as induction of R-loops, or a combination thereof.  
404 Use of the HRD score and/or screening for mutations in the novel HRD driver genes we identified  
405 may provide biomarkers that could be used to stratify patients based on their predicted response to  
406 PARP inhibitors and expand the number of cancers that might benefit from such treatment.  
407 Alternatively, pharmacological induction of HRD by inhibiting RBPs may offer a novel approach  
408 to sensitize tumor cells to PARP inhibitors.

409

410 The novel drivers of HRD identified here were enriched for loci associated with cancer risk in  
411 prior GWAS studies. Risk-reduction surgery for BRCA-related breast cancer can decrease the risk

412 of developing cancer from 85%-100%, but these surgeries are not without potential risk and should  
413 be focused on high-risk individuals (Nelson et al., 2014). Integration of GWAS studies with  
414 mechanistic understanding can increase the confidence in the relevance of GWAS-uncovered  
415 candidate cancer risk loci. In turn, this could advance cancer prevention programs by improving  
416 the genetic information available to genetic counselors and patients.

## 417 **MATERIALS AND METHODS**

418 Further information and requests for resources and reagents should be directed to and will be  
419 fulfilled by the Lead Contact, Nidhi Sahni ([nsahni@mdanderson.org](mailto:nsahni@mdanderson.org)).

420

421 **Data sets utilized and data availability.** TCGA RNAseq gene expression, alternative splicing,  
422 methylation, copy number, RPPA, and clinical data were downloaded from the GDC data  
423 commons (<https://portal.gdc.cancer.gov/>). TCGA CPTAC data were acquired from the  
424 manuscript's supplemental information (Mertins et al., 2016). ICGC data were downloaded from  
425 the ICGC data portal (<https://dcc.icgc.org/>). GWAS data were downloaded from GWASdb v2  
426 (<http://jjwanglab.org/gwasdb>) (Li et al., 2016). MicroRNA targets were downloaded from miRDB  
427 (<http://mirdb.org/>) (Wong and Wang, 2015). Table S1 contains all HRD tumors, with identified  
428 HRD drivers and gene annotations. RNAseq data generated in this manuscript are available at  
429 NCBI GEO accession GSE153396.

430

431 **Calculation of HRD score.** We calculated the genomic scar HRD scores from SNP arrays  
432 following the previous published 3 components of HRD score: loss of heterozygosity (LOH)  
433 (Abkevich et al., 2012), large scale transitions (LST) (Popova et al., 2012), and telomere allelic  
434 imbalance (TAI or NtAI) (Birkbak et al., 2012), and used the sum of all 3 scores as the final HRD  
435 score (Knijnenburg et al., 2018; Marquard et al., 2015; Telli et al., 2016).

436

437 **Association of molecular data with HRD score.** To analyze RNA, miRNA, and proteins that  
438 were associated with high HRD scores we performed regression with a generalized linear mixed  
439 effects model, taking the tumor type as a random effect. For gene expression changes from

440 RNAseq data, the resulting regression coefficients were used for gene set enrichment analysis as  
441 described (Subramanian et al., 2005). For protein data from RPPA, regression coefficients and  
442 corresponding P values were reported directly with false discovery rate determined with  
443 Benjamini–Hochberg procedure. For miRNA data, regression coefficients and corresponding P  
444 values were reported directly with the FDR determined using Storey’s method. To define those  
445 pathways that were preferentially suppressed by miRNAs, we retrieved predicted miRNA gene  
446 targets from MicroRNA Target Prediction Database (miRDB). For each significant microRNA,  
447 the regression coefficient was added to all candidate target genes, yielding a positive score for  
448 genes predicted to be preferentially targeted by microRNAs in HRD tumors. Resulting microRNA  
449 scores were utilized for GSEA, and the top 5 significant pathways were reported.

450

451 **Threshold score to separate HRD positive vs. negative.** To define a gold standard by which to  
452 define a threshold to identify HRD positive tumors, we selected breast, ovarian, prostate, and  
453 pancreatic tumors that had germline mutations in *BRCA1* or *BRCA2*. For determining the optimal  
454 threshold value, we performed stochastic sub-sampling using 50% of all patients for 1000  
455 iterations. For each iteration, we determined a modified Youden’s J statistic defined as  $J' = 2 * \text{true}$   
456  $\text{positive rate} + \text{true negative rate} - 2$ , with increased weighting on the true positive rate because  
457 the definition of true positives was more robust than that of true negatives. The modal threshold  
458 value was determined to be 31, which was used to classify tumors as HRD positive or HRD  
459 negative.

460

461 **Identification of novel candidate HRD drivers.** To identify candidate HRD drivers, we initially  
462 used canonical DDR genes (Lord and Ashworth, 2016) as well as highly validated candidates from

463 two previous studies (Adamson et al., 2012; Herr et al., 2015). Genetic events were defined as  
464 either mutations or methylation events. Mutation events were constrained to variant allele  
465 frequencies (VAF) of at least 0.1. Methylation events were only considered if in the given tumor  
466 type methylation significantly correlated with gene expression ( $r \leq -0.25$ ), and the specific tumor  
467 exhibited both methylation and down-regulation (1 standard deviation) of the candidate gene. To  
468 assign genes to individual tumors, a scoring metric of  $2 * (\text{HRD score, upper tertile}) + (\text{HRD score,}$   
469  $\text{lower } 20^{\text{th}} \text{ percentile}) - 0.5 * (\text{Coefficient of variation})$  was used to rank genes, with the highest  
470 scoring gene being assigned as the cause for a given tumor. To identify novel candidate genes for  
471 the next iteration, we first computed an interaction score using a merged protein interaction list  
472 from both the BioPlex affinity purification-mass spectrometry network (Huttlin et al., 2015) as  
473 well as a literature curated network (Menche et al., 2015). For all genes, we determined the number  
474 of interactions with genes identified to be candidate drivers of HR defects, and then z-transformed  
475 these values. This z-normalized network score was averaged with a z-normalized score for  
476 induction of HR defects from two siRNA screens (Adamson et al., 2012; Herr et al., 2015). All  
477 genes that score above the 25<sup>th</sup> percentile of candidate genes identified in the prior iteration were  
478 added for the next iteration. This process was completed until convergence, that is no additional  
479 candidate genes were identified.

480

481 **DR-GFP HR reporter assay.** The DR-GFP reporter assay was performed in U2OS cells per  
482 previous publications (Pierce et al., 1999). Transfection with siRNA or the RFP-tagged protein of  
483 interest was performed 12 hours prior to transfection with I-SceI (Addgene #26477) or GFP control  
484 (Addgene #89684). All transfections were performed with Lipofectamine 3000 per the  
485 manufacturer's instructions. Two days after I-SceI/GFP transfection, samples were analyzed by

486 flow cytometry. After gating for singlets and cell size, GFP positivity was gated based on SSC vs.  
487 GFP intensity. All values were normalized to the average of siCTRL and non-transfected controls  
488 for siRNA experiments, and RFP-tagged wild-type protein overexpression for analysis of RFP-  
489 tagged mutant proteins.

490

491

492 **RFP-tagged mutant constructs.** To generate point mutations, we implemented a modified high-  
493 throughput site-directed mutagenesis pipeline described previously (Sahni et al., 2015; Yi et al.,  
494 2017). Briefly, we used the corresponding wild-type reference ORFs from their Entry clones in  
495 human ORFeome as template for a 3-step PCR experiment. For a given mutation, PCR cloning  
496 consisted of two “primary PCRs” to generate gene fragments, and one “fusion PCR” to obtain the  
497 mutated ORF. For the primary PCRs, two universal primers, Tag1-M13F and Tag2-M13R  
498 (sequences shown below), and two ORF-specific internal forward and reverse primers were  
499 employed. The two universal primers allowed the preservation of the attL sites on both ends of the  
500 ORF. The mutation-specific primers (namely MutF and MutR), encompassing the desired single  
501 nucleotide change, were designed to have an overlapping region of ~40 base pairs. The two ORF  
502 fragments flanking the mutation of a gene were amplified using the primer pair Tag1-M13F and  
503 MutR, and the primer pair Tag2-M13R and MutF, respectively. For the fusion PCR, the two  
504 primary PCR fragments were fused together using the primer pair Tag1 and Tag2 (sequences  
505 shown below) to generate the single amino acid change mutation allele. The final product was a  
506 full-length ORF harboring the desired mutation. All wild-type and mutant allele clones were  
507 transferred by Gateway recombination into a mammalian expression vector containing a C-



508 terminal RFP tag. For subsequent sequence confirmation, the inserts were PCR amplified with  
509 KOD HotStart Polymerase (Novagen) and verified by Sanger sequencing.

510 Primer sequences:

- 511 • *Tag1-M13F*: 5'-GGCAGACGTGCCTCACTCCCAGTCACGACGTTGTAACG-3'
- 512 • *Tag2-M13R*: 5'-CTGAGCTTGACGCATTGCTAGTGTCTCAAATCTCTGATGTTAC-3'
- 513 • *Tag1*: 5'-GGCAGACGTGCCTCACTACT-3'
- 514 • *Tag2*: 5'-CTGAGCTTGACGCATTGCTA-3'

515

516 **IR induced foci formation.** Cells were grown on glass coverslips, irradiated with either 5 Gy or  
517 10 Gy, and incubated as specified. To analyze chromatin bound fractions, the soluble fraction was  
518 extracted prior to fixation, as described (McGrail et al., 2017). For analysis of RFP-tagged protein  
519 foci formation, cells were transfected 48 hours prior to irradiation using Lipofectamine 3000 per  
520 manufacturer's instructions prior to fixation and detection of phosphorylated histone variant  
521 H2AX using indirect immunofluorescence with anti- $\gamma$ H2AX (clone JBW301, Millipore Sigma).  
522 For IR-induced Rad51 foci, cycling cells were pulse labeled with 10  $\mu$ M EdU prior to irradiation.  
523 EdU was labeled with CLICK chemistry as described (Fang et al., 2019). Nuclei and Rad51 foci  
524 were segmented, and EdU positivity was determined from integrated intensity in each nuclei  
525 compared to a no EdU stained control. Rad51 positivity was analyzed only in EdU positive cells,  
526 and defined relative to control cells without irradiation. For siRNA experiments, cells were  
527 transfected with siRNA 48 hours prior to irradiation. For Pladienolide B experiments, cells were  
528 treated with Pladienolide B (Tocris) 24 hours prior to irradiation. Cells were imaged by  
529 fluorescence microscopy (Eclipse TE2000E, Nikon), capturing all images for a given replicate

530 simultaneously to assure no variances in light intensity. All quantification was performed in  
531 Matlab R2016a.

532

533 **PARP sensitivity assays.** For short term assays, cells were plated in 96 well plates before  
534 treatment with specified concentrations of BMN673 (Selleck), AZD2281 (Selleck), Pladienolide  
535 B, or vehicle control. Cells were incubated for 5 days, and viability was assessed using PrestoBlue  
536 (Invitrogen) relative to vehicle controls (DMSO for BMN673 and AZD2281, ethanol for  
537 Pladienolide B). Synergy was assessed using the Chou-Talalay combination index (Chou, 2006).  
538 For clonogenic assays, cells were plated in 12 well plates and incubated with drugs for two weeks  
539 before fixation and staining with crystal violet. Plates were scanned, and the crystal violet was  
540 extracted with 10% acetic acid. Absorbance of solubilized crystal violet was measured at 590 nm  
541 using a plate reader, and viability was normalized to a solvent-treated control. For stable shRNA  
542 cells, Dharmacon pGIPZ Lenti shRNA vectors were used including a pGIPZ non-silencing  
543 control (RHS4346), shDDX3X (V3LHS\_644473, V2LHS\_202531), shSF3B3 (V3LHS\_644840,  
544 V2LHS\_43924), and shBRCA2 (V2LHS\_89238, V2LHS\_89237).

545

546 **RNaseq with depletion of RNA binding proteins.** Cells (BT-549, MDA-MB-231, or U2OS)  
547 were transfected with the desired siRNAs (Table S3) using Lipofectamine 3000 48 hours prior to  
548 RNA isolation with a Qiagen RNeasy Kit. RNA quality was confirmed using the Agilent  
549 TapeStation RNA reagents according to the manufacturer's protocol. Libraries were prepped using  
550 the Lexogen QuantSeq 3' mRNA-Seq Library Prep Kit FWD for Illumina with 6nt unique dual  
551 indexing using. 100ng of RNA was used as input material for an automated protocol adapted for  
552 the Perkin Elmer SciClone NGS Workstation. Libraries were analyzed for quality using the

553 Agilent TapeStation High Sensitivity DNA kit and for quantity using Qubit dsDNA HS assay, in  
554 384-well format, using 20 $\mu$ L reactions in triplicate (19 $\mu$ L working reagent + 1 $\mu$ L sample or  
555 standard) with an 11-point standard curve from 0-10ng/ $\mu$ L. Plates were shaken in the plate reader  
556 for 5 seconds, then measured for fluorescence (excitation: 480nm, emission: 530nm). Sample  
557 concentrations were determined using the standard curve. Libraries made from each RNA sample  
558 were then pooled at 25 nM each, denatured with 1M NaOH added to a 0.2M final concentration  
559 (5 min at room temperature), and quenched with 200mM Tris HCl (pH 7). 1% PhyX spike-in  
560 (Illumina) was added then pooled, denatured libraries were run on an Illumina NovaSeq with a  
561 NovaSeq 6000 SP Reagent Kit (100 cycles) using 51bp reads, 6bp index reads, and paired-end  
562 single read parameters.

563

564 **Identification of RNA binding proteins that may modulate DDR genes.** To test whether RBPs  
565 were modulating DDR genes, we performed multiple analyses. First, RNAseq analysis following  
566 siRNA-mediated depletion of 17 RBPs in 3 cell lines was used to identify differential DDR gene  
567 expression relative to either siCTRL, or siBRCA1/siBRCA2 by paired t-test. Next, TCGA tumors  
568 were analyzed to detect decreased DDR gene expression relative to HR competent tumors or  
569 tumors with HRD caused by DDR genes using a generalized linear mixed effects model, taking  
570 the tumor type as a random effect. Finally, the same comparisons in TCGA tumors was made using  
571 alternative splicing instead of gene expression levels. We considered gene expression changes that  
572 caused decreased gene expression with an FDR of less than 10%, or events that were detected in  
573 both patient tumors and cell lines with a nominal P value of at least 0.05. For alternative splicing,  
574 increased or decreased alternative splicing at 10% FDR was considered an event. The resulting  
575 network was visualized in Cytoscape v3.5.1.

576

577 **Statistics.** Specific statistical tests are discussed within corresponding sections. In general, pan-  
578 cancer associations with HRD score were determined using a generalized linear mixed effects  
579 model, taking the tumor type as a random effect. Multiple comparisons were corrected for using  
580 either Storey's method (large number of variables) or the Benjamini–Hochberg procedure (smaller  
581 number of variables). Comparisons of normally distributed data were made using either t tests (2  
582 groups) or one-way ANOVA (3+ groups) with appropriate post-hoc analysis. Comparisons of non-  
583 normally distributed data were made using rank sum test (2 groups) or Kruskal-Wallis (3+ groups)  
584 with appropriate post-hoc test. Correlations were assessed using Spearman rank correlation  
585 coefficients. Categorical variables were compared using Fisher's exact test.

586

#### 587 **Supplemental Tables.**

588 Table S1. Identified causes of HR defects, Related to Figure 3.

589 Table S2. Functional analysis of putative novel drivers of HRD, Related to Figure 4.

590 Table S3. siRNAs used in this study, Related to Materials and Methods

591

#### 592 **ACKNOWLEDGEMENTS**

593 N.S. is a CPRIT Scholar in Cancer Research with funding from the Cancer Prevention and  
594 Research Institute of Texas (CPRIT) New Investigator Grant RR160021. NS is a recipient of the  
595 Liz Tilberis Early Career Award funded by Ovarian Cancer Research Alliance grant #649968 and  
596 Young Investigator grant from the Breast Cancer Alliance. D.J.M. was supported by Susan G.  
597 Komen PDF17483544 and NCI grant K99CA240689. S.Y. was supported by Komen Foundation  
598 grant CCR19609287. M.L.M was supported by the Susan G. Komen Foundation (CCR17488145),

599 National Cancer Institute of the NIH (R00CA175293), the Kimmel Scholar (SKF-16-135) and  
600 Lynn Sage Scholar awards. Additional support was provided by a Department of Defense Era of  
601 Hope Scholar Award (W81XWH-10-1-0558) and George and Barbara Bush Endowment for  
602 Innovative Cancer Research to S.-Y.L. and U01CA217842 to G.B.M. We appreciate MD  
603 Anderson Cancer Center core facilities funded by grant CA016672: the Functional Genomics Core  
604 (shRNA and ORFeome Core) for reagents and technical assistance and the Characterized Cell Line  
605 Core for STR DNA fingerprinting and mycoplasma testing. The results here are in whole or part  
606 based upon data generated by the TCGA Research Network: <http://cancergenome.nih.gov/>.

607

## 608 **Author Contributions**

609 D.J.M., S.Y., and N.S. conceived the study; D.J.M wrote the manuscript with significant input  
610 from B.D., M.L.M, G.B.M., S.Y. and N.S. D.J.M and B.F. performed computational analysis with  
611 input from G.B.M., S.Y. and N.S. D.J.M. conducted most of the experiments with help from N.S.,  
612 R.S.S., Yang Li and L.H. N.S., Yongsheng Li., and L.H. generated the allele libraries. N.S., R.S.S.,  
613 and Yang Li performed siRNA treatment, library preparation and RNA sequencing. S.-Y.L., S.Y.,  
614 and N.S. provided intellectual input and supervision throughout the course of the study. All authors  
615 read and approved the final manuscript.

616

## 617 **Declaration of Interests**

618 G.B.M. consults with AstraZeneca, ImmunoMET, Ionis, Nuevolution, PDX bio, Signalchem,  
619 Symphogen, and Tarveda, has stock options with Catena Pharmaceuticals, ImmunoMet,  
620 SignalChem, Spindle Top Ventures, and Tarveda, sponsored research from AstraZeneca,  
621 Immunomet, Pfizer, Nanostring, and Tesaro, travel support from Chrysallis Bio, and has licensed

622 technology to Nanostring and Myriad Genetics. B.F. is an employee of AstraZeneca. No other  
623 authors declare competing interests.

624

625 **REFERENCES**

- 626 Abkevich, V., Timms, K.M., Hennessy, B.T., Potter, J., Carey, M.S., Meyer, L. a., Smith-  
627 McCune, K., Broaddus, R., Lu, K.H., Chen, J., et al. (2012). Patterns of genomic loss of  
628 heterozygosity predict homologous recombination repair defects in epithelial ovarian cancer. *Br.*  
629 *J. Cancer* *107*, 1776–1782. <https://doi.org/10.1038/bjc.2012.451>.
- 630 Adamson, B., Smogorzewska, A., Sigoillot, F.D., King, R.W., and Elledge, S.J. (2012). A  
631 genome-wide homologous recombination screen identifies the RNA-binding protein RBMX as a  
632 component of the DNA-damage response. *Nat. Cell Biol.* *14*, 318–328.  
633 <https://doi.org/10.1038/ncb2426>.
- 634 Bartkova, J., Rezaei, N., Liontos, M., Karakaidos, P., Kletsas, D., Issaeva, N., Vassiliou, L.-V.F.,  
635 Kolettas, E., Niforou, K., Zoumpourlis, V.C., et al. (2006). Oncogene-induced senescence is part  
636 of the tumorigenesis barrier imposed by DNA damage checkpoints. *Nature* *444*, 633–637.  
637 <https://doi.org/10.1038/nature05268>.
- 638 Beral, V., Bull, D., Doll, R., Peto, R., Reeves, G., Skegg, D., Colditz, G., Hulka, B., La Vecchia,  
639 C., Magnusson, C., et al. (2001). Familial breast cancer: Collaborative reanalysis of individual  
640 data from 52 epidemiological studies including 58 209 women with breast cancer and 101 986  
641 women without the disease. *Lancet* *358*, 1389–1399. [https://doi.org/10.1016/S0140-](https://doi.org/10.1016/S0140-6736(01)06524-2)  
642 [6736\(01\)06524-2](https://doi.org/10.1016/S0140-6736(01)06524-2).
- 643 Birkbak, N.J., Wang, Z.C., Kim, J.-Y., Eklund, A.C., Li, Q., Tian, R., Bowman-Colin, C., Li, Y.,  
644 Greene-Colozzi, A., Iglehart, J.D., et al. (2012). Telomeric Allelic Imbalance Indicates Defective  
645 DNA Repair and Sensitivity to DNA-Damaging Agents. *Cancer Discov.* *2*, 366–375.  
646 <https://doi.org/10.1158/2159-8290.CD-11-0206>.

- 647 Brown, J.S., Kaye, S.B., and Yap, T.A. (2016). PARP inhibitors: the race is on. *Br. J. Cancer*  
648 *114*, 713–715. <https://doi.org/10.1038/bjc.2016.67>.
- 649 Chou, T.-C. (2006). Theoretical Basis, Experimental Design, and Computerized Simulation of  
650 Synergism and Antagonism in Drug Combination Studies. *Pharmacol. Rev.* *58*, 621–681.  
651 <https://doi.org/10.1124/pr.58.3.10>.
- 652 Ciccia, A., and Elledge, S.J. (2010). The DNA Damage Response: Making It Safe to Play with  
653 Knives. *Mol. Cell* *40*, 179–204. <https://doi.org/10.1016/j.molcel.2010.09.019>.
- 654 Couch, F.J., Nathanson, K.L., and Offit, K. (2014). Two decades after BRCA: Setting paradigms  
655 in personalized cancer care and prevention. *Science (80-. )*. *343*, 1466–1470.  
656 <https://doi.org/10.1126/science.1251827>.
- 657 Fang, Y., McGrail, D.J., Sun, C., Labrie, M., Chen, X., Zhang, D., Ju, Z., Vellano, C.P., Lu, Y.,  
658 Li, Y., et al. (2019). Sequential Therapy with PARP and WEE1 Inhibitors Minimizes Toxicity  
659 while Maintaining Efficacy. *Cancer Cell* *35*, 851-867.e7.  
660 <https://doi.org/10.1016/j.ccell.2019.05.001>.
- 661 Francia, S., Michelini, F., Saxena, A., Tang, D., de Hoon, M., Anelli, V., Mione, M., Carninci,  
662 P., and d’Adda di Fagagna, F. (2012). Site-specific DICER and DROSHA RNA products control  
663 the DNA-damage response. *Nature* *488*, 231–235. <https://doi.org/10.1038/nature11179>.
- 664 Garber, J.E., and Offit, K. (2005). Hereditary cancer predisposition syndromes. *J. Clin. Oncol.*  
665 *23*, 276–292. <https://doi.org/10.1200/JCO.2005.10.042>.
- 666 Hanahan, D., and Weinberg, R.A. (2011). Hallmarks of cancer: The next generation. *Cell* *144*,  
667 646–674. <https://doi.org/10.1016/j.cell.2011.02.013>.



- 668 Herr, P., Lundin, C., Evers, B., Ebner, D., Bauerschmidt, C., Kingham, G., Palmai-Pallag, T.,  
669 Mortusewicz, O., Frings, O., Sonnhammer, E., et al. (2015). A genome-wide IR-induced RAD51  
670 foci RNAi screen identifies CDC73 involved in chromatin remodeling for DNA repair. *Cell*  
671 *Discov. 1*, 15034. <https://doi.org/10.1038/celldisc.2015.34>.
- 672 Huttlin, E.L., Ting, L., Bruckner, R.J., Gebreab, F., Gygi, M.P., Szpyt, J., Tam, S., Zarraga, G.,  
673 Colby, G., Baltier, K., et al. (2015). The BioPlex Network: A Systematic Exploration of the  
674 Human Interactome. *Cell 162*, 425–440. <https://doi.org/10.1016/j.cell.2015.06.043>.
- 675 Keskin, H., Shen, Y., Huang, F., Patel, M., Yang, T., Ashley, K., Mazin, A. V., and Storici, F.  
676 (2014). Transcript-RNA-templated DNA recombination and repair. *Nature 515*, 436–439.  
677 <https://doi.org/10.1038/nature13682>.
- 678 Knijnenburg, T.A., Wang, L., Zimmermann, M.T., Chambwe, N., Gao, G.F., Cherniack, A.D.,  
679 Fan, H., Shen, H., Way, G.P., Greene, C.S., et al. (2018). Genomic and Molecular Landscape of  
680 DNA Damage Repair Deficiency across The Cancer Genome Atlas. *Cell Rep. 23*, 239-254.e6.  
681 <https://doi.org/10.1016/j.celrep.2018.03.076>.
- 682 Konstantinopoulos, P.A., Ceccaldi, R., Shapiro, G.I., and D’Andrea, A.D. (2015). Homologous  
683 recombination deficiency: Exploiting the fundamental vulnerability of ovarian cancer. *Cancer*  
684 *Discov. 5*, 1137–1154. <https://doi.org/10.1158/2159-8290.CD-15-0714>.
- 685 Lemery, S., Keegan, P., and Pazdur, R. (2017). First FDA Approval Agnostic of Cancer Site —  
686 When a Biomarker Defines the Indication. *N. Engl. J. Med. 377*, 1409–1412.  
687 <https://doi.org/10.1056/NEJMp1709968>.
- 688 Li, M.J., Liu, Z., Wang, P., Wong, M.P., Nelson, M.R., Kocher, J.-P.A., Yeager, M., Sham, P.C.,  
689 Chanock, S.J., Xia, Z., et al. (2016). GWASdb v2: an update database for human genetic variants

690 identified by genome-wide association studies. *Nucleic Acids Res.* *44*, D869–D876.  
691 <https://doi.org/10.1093/nar/gkv1317>.

692 Livraghi, L., and Garber, J.E. (2015). PARP inhibitors in the management of breast cancer:  
693 current data and future prospects. *BMC Med.* *13*, 188. [https://doi.org/10.1186/s12916-015-0425-](https://doi.org/10.1186/s12916-015-0425-1)  
694 1.

695 Lord, C.J., and Ashworth, A. (2016). BRCAness revisited. *Nat. Rev. Cancer* *16*, 110–120.  
696 <https://doi.org/10.1038/nrc.2015.21>.

697 Marchesini, M., Ogoti, Y., Fiorini, E., Aktas Samur, A., Nezi, L., D’Anca, M., Storti, P., Samur,  
698 M.K., Ganan-Gomez, I., Fulciniti, M.T., et al. (2017). ILF2 Is a Regulator of RNA Splicing and  
699 DNA Damage Response in 1q21-Amplified Multiple Myeloma. *Cancer Cell* *32*, 88-100.e6.  
700 <https://doi.org/10.1016/j.ccell.2017.05.011>.

701 Marquard, A.M., Eklund, A.C., Joshi, T., Krzystanek, M., Favero, F., Wang, Z.C., Richardson,  
702 A.L., Silver, D.P., Szallasi, Z., and Birkbak, N.J. (2015). Pan-cancer analysis of genomic scar  
703 signatures associated with homologous recombination deficiency suggests novel indications for  
704 existing cancer drugs. *Biomark. Res.* *3*, 9. <https://doi.org/10.1186/s40364-015-0033-4>.

705 McGrail, D.J., Lin, C.C.-J., Garnett, J., Liu, Q., Mo, W., Dai, H., Lu, Y., Yu, Q., Ju, Z., Yin, J.,  
706 et al. (2017). Improved prediction of PARP inhibitor response and identification of synergizing  
707 agents through use of a novel gene expression signature generation algorithm. *Npj Syst. Biol.*  
708 *Appl.* *3*, 8. <https://doi.org/10.1038/s41540-017-0011-6>.

709 Menche, J., Sharma, A., Kitsak, M., Ghiassian, S.D., Vidal, M., Loscalzo, J., and Barabasi, A.-L.  
710 (2015). Uncovering disease-disease relationships through the incomplete interactome. *Science*  
711 (80-. ). *347*, 1257601–1257601. <https://doi.org/10.1126/science.1257601>.

712 Mertins, P., Mani, D.R., Ruggles, K. V., Gillette, M.A., Clauser, K.R., Wang, P., Wang, X.,  
713 Qiao, J.W., Cao, S., Petralia, F., et al. (2016). Proteogenomics connects somatic mutations to  
714 signalling in breast cancer. *Nature* 534, 55–62. <https://doi.org/10.1038/nature18003>.

715 Nelson, H.D., Pappas, M., Zakher, B., Mitchell, J.P., Okinaka-Hu, L., and Fu, R. (2014). Risk  
716 assessment, genetic counseling, and genetic testing for BRCA-related cancer in women: A  
717 systematic review to update the U.S. preventive services task force recommendation. *Ann.*  
718 *Intern. Med.* 160, 255–266. <https://doi.org/10.7326/m13-1684>.

719 Nielsen, F.C., Van Overeem Hansen, T., and Sørensen, C.S. (2016). Hereditary breast and  
720 ovarian cancer: New genes in confined pathways. *Nat. Rev. Cancer* 16, 599–612.  
721 <https://doi.org/10.1038/nrc.2016.72>.

722 Pierce, A.J., Johnson, R.D., Thompson, L.H., and Jasin, M. (1999). XRCC3 promotes homology-  
723 directed repair of DNA damage in mammalian cells. *Genes Dev.* 13, 2633–2638.  
724 <https://doi.org/10.1101/gad.13.20.2633>.

725 Pilié, P.G., Tang, C., Mills, G.B., and Yap, T.A. (2018). State-of-the-art strategies for targeting  
726 the DNA damage response in cancer. *Nat. Rev. Clin. Oncol.* 1. [https://doi.org/10.1038/s41571-](https://doi.org/10.1038/s41571-018-0114-z)  
727 [018-0114-z](https://doi.org/10.1038/s41571-018-0114-z).

728 Popova, T., Manié, E., Rieunier, G., Caux-Moncoutier, V., Tirapo, C., Dubois, T., Delattre, O.,  
729 Sigal-Zafrani, B., Bollet, M., Longy, M., et al. (2012). Ploidy and large-scale genomic instability  
730 consistently identify basal-like breast carcinomas with BRCA1/2 inactivation. *Cancer Res.* 72,  
731 5454–5462. <https://doi.org/10.1158/0008-5472.CAN-12-1470>.

732 Rossi, M.J., DiDomenico, S.F., Patel, M., and Mazin, A. V. (2021). RAD52: Paradigm of  
733 Synthetic Lethality and New Developments. *Front. Genet.* 12.

- 734 <https://doi.org/10.3389/fgene.2021.780293>.
- 735 Sahni, N., Yi, S., Taipale, M., Fuxman Bass, J.I., Coulombe-Huntington, J., Yang, F., Peng, J.,  
736 Weile, J., Karras, G.I., Wang, Y., et al. (2015). Widespread Macromolecular Interaction  
737 Perturbations in Human Genetic Disorders. *Cell* 161, 647–660.  
738 <https://doi.org/10.1016/j.cell.2015.04.013>.
- 739 Shahi, A., Lee, J.-H., Kang, Y., Lee, S.H., Hyun, J.-W., Chang, I.-Y., Jun, J.-Y., and You, H.J.  
740 (2011). Mismatch-repair protein MSH6 is associated with Ku70 and regulates DNA double-  
741 strand break repair. *Nucleic Acids Res.* 39, 2130–2143. <https://doi.org/10.1093/nar/gkq1095>.
- 742 Subramanian, A., Tamayo, P., Mootha, V.K., Mukherjee, S., Ebert, B.L., Gillette, M.A.,  
743 Paulovich, A., Pomeroy, S.L., Golub, T.R., Lander, E.S., et al. (2005). Gene set enrichment  
744 analysis: a knowledge-based approach for interpreting genome-wide expression profiles. *Proc.*  
745 *Natl. Acad. Sci. U. S. A.* 102, 15545–15550. <https://doi.org/10.1073/pnas.0506580102>.
- 746 Telli, M.L., Timms, K.M., Reid, J., Hennessy, B., Mills, G.B., Jensen, K.C., Szallasi, Z., Barry,  
747 W.T., Winer, E.P., Tung, N.M., et al. (2016). Homologous Recombination Deficiency (HRD)  
748 Score Predicts Response to Platinum-Containing Neoadjuvant Chemotherapy in Patients with  
749 Triple-Negative Breast Cancer. *Clin. Cancer Res.* 22, 3764–3773. [https://doi.org/10.1158/1078-](https://doi.org/10.1158/1078-0432.CCR-15-2477)  
750 [0432.CCR-15-2477](https://doi.org/10.1158/1078-0432.CCR-15-2477).
- 751 Tresini, M., Warmerdam, D.O., Kolovos, P., Snijder, L., Vrouwe, M.G., Demmers, J.A.A., van  
752 IJcken, W.F.J., Grosveld, F.G., Medema, R.H., Hoeijmakers, J.H.J., et al. (2015). The core  
753 spliceosome as target and effector of non-canonical ATM signalling. *Nature* 523, 53–58.  
754 <https://doi.org/10.1038/nature14512>.
- 755 Wong, N., and Wang, X. (2015). miRDB: an online resource for microRNA target prediction and

- 756 functional annotations. *Nucleic Acids Res.* *43*, D146. <https://doi.org/10.1093/NAR/GKU1104>.
- 757 Yi, S., Liu, N.N., Hu, L., Wang, H., and Sahni, N. (2017). Base-resolution stratification of cancer  
758 mutations using functional variomics. *Nat. Protoc.* *12*, 2323–2341.  
759 <https://doi.org/10.1038/nprot.2017.086>.
- 760 Zimmermann, M., Murina, O., Reijns, M.A.M., Agathangelou, A., Challis, R., Tarnauskaitė, Ž.,  
761 Muir, M., Fluteau, A., Aregger, M., McEwan, A., et al. (2018). CRISPR screens identify  
762 genomic ribonucleotides as a source of PARP-trapping lesions. *Nature*  
763 <https://doi.org/10.1038/s41586-018-0291-z>.
- 764

765 **FIGURES**

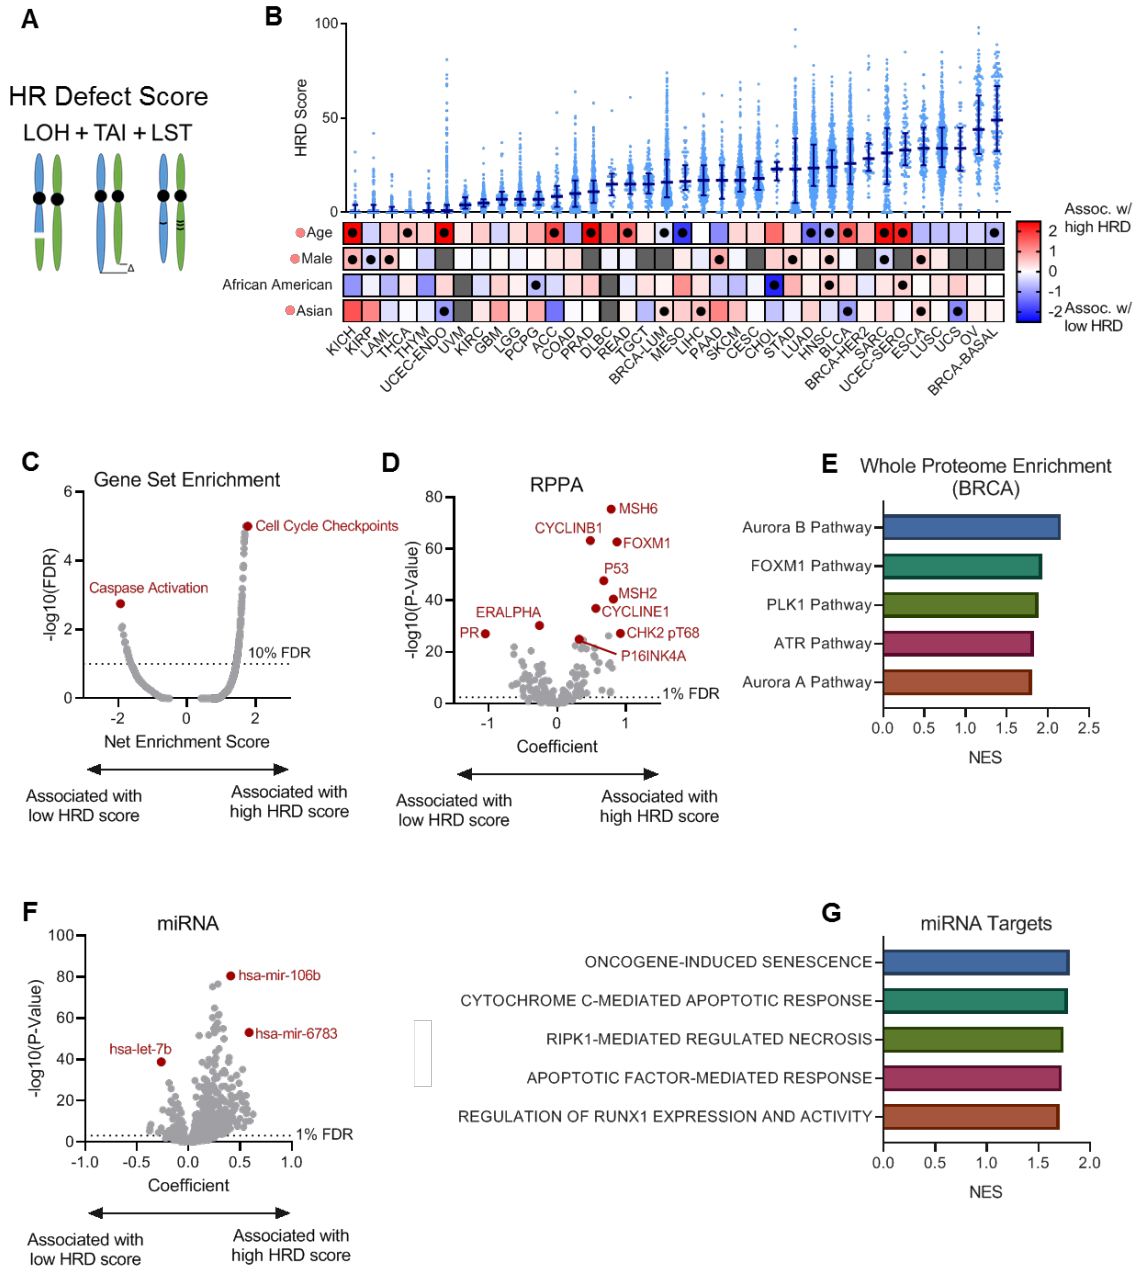

766

767 **Figure 1 | Pan-cancer analysis of HR defects.**

768 (A) Schematic describing the HR defect score, defined as the sum of scores for loss of  
 769 heterozygosity (LOH), telomere allelic imbalance (TAI), and large scale state transitions (LST).

770 **(B)** HRD scores across tumor types (top), and associations with various demographic features  
771 (bottom). HRD score is plotted as median value with error bars representing interquartile range.  
772 Demographic features scale from red (positive association with HRD score) to blue (negative  
773 association with HRD score). Black dots represent significant relationships within a given cancer  
774 type. Red dots next to demographic categories represent a significant positive association across  
775 all cancer types.

776 **(C)** Gene set enrichment based on relationship with HRD score. A generalized linear mixed model  
777 was used to determine the association between RNAseq-derived gene expression levels and HRD  
778 scores, taking tumor type as a random effect. The resulting coefficients were used for gene set  
779 enrichment analysis.

780 **(D)** Association between HRD score and protein levels. A generalized linear mixed model was  
781 used to determine the association between reverse phase protein array-derived protein levels and  
782 HRD scores, taking tumor type as a random effect. FDR was determined using the Benjamini–  
783 Hochberg procedure.

784 **(E)** Pathway enrichment determined from whole-proteome mass spectrometry in breast cancer.  
785 Spearman correlation coefficients were determined between proteins and HRD scores. The  
786 resulting correlation coefficients were used for gene set enrichment analysis. The five most  
787 significantly enriched pathways are shown. NES = normalized enrichment score.

788 **(F)** Association between HRD score and microRNA levels. A generalized linear mixed model was  
789 used to determine the association between microRNA levels and HRD scores, taking tumor type  
790 as a random effect. FDR was determined by the method of Storey.

791 **(G)** Gene set enrichment of microRNA target genes. For each gene, a score was quantified as the  
792 sum of all coefficients for significant (FDR<1%) microRNAs that could target that gene. The

793 resulting list of scores was used for GSEA. The five most significantly enriched pathways are

794 shown, demonstrating pathways predicted to be suppressed by miRNAs associated with HRD

795 score. NES = normalized enrichment score.

796 See also Figure S1.

797



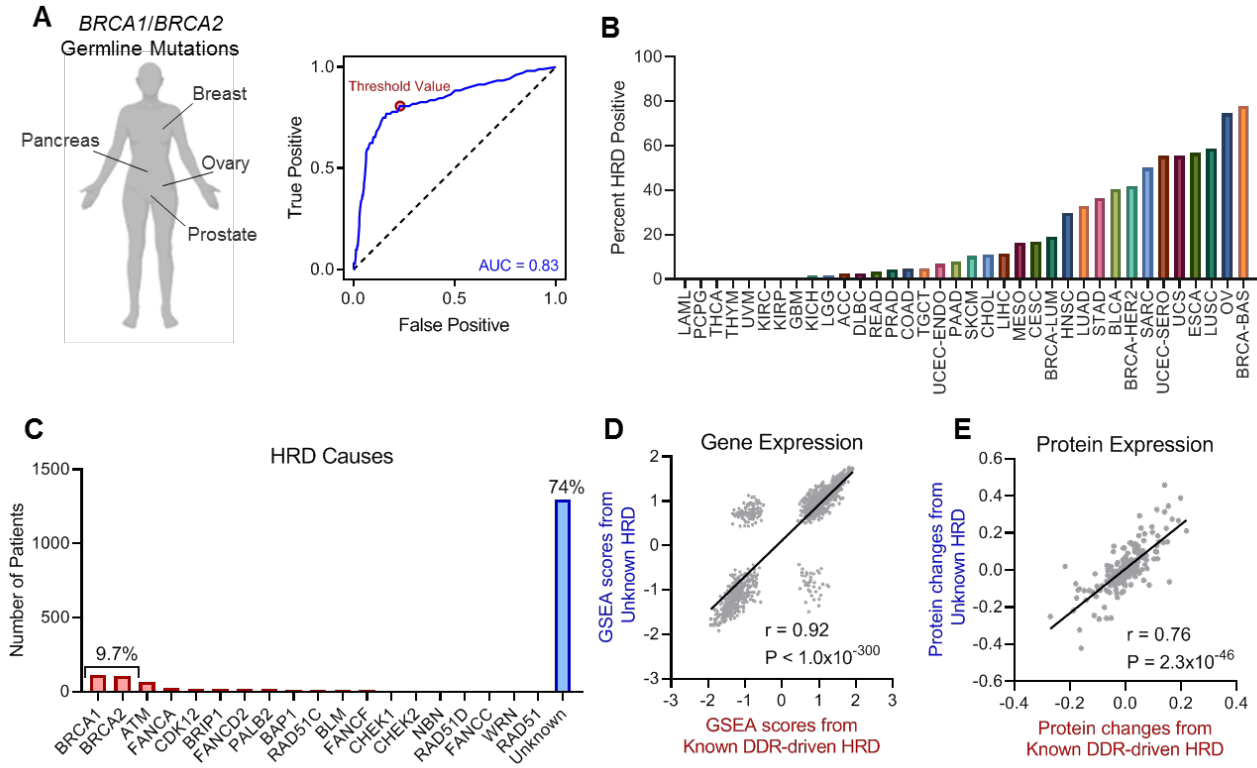

798

799 **Figure 2 | Most HR deficiencies are of unknown aetiology.**

800 (A) Receiver operator characteristic curve (ROC) (blue) demonstrating the ability of the HRD  
 801 score to predict germline mutations in *BRCA1* or *BRCA2* in the indicated tumor types. AUC is  
 802 defined as the area under ROC curve. The dotted line represents the expectation due to random  
 803 assignment. The red dot indicates the calculated optimal threshold value to separate HRD positive  
 804 (HRD<sup>+</sup>) and HR competent tumors.

805 (B) Percentage of HRD positive tumors by cancer type.

806 (C) Percentage of HRD positive tumors caused by *BRCA1*, *BRCA2*, other canonical DDR genes,  
 807 and those of unknown aetiology.

808 (D) Correlation of gene set enrichment analysis performed on gene expression changes between  
 809 DDR-driven HRD positive tumors and HR competent tumors (plotted on x-axis), or HRD positive

810 tumors of unknown aetiology and HR competent tumors (plotted on y-axis). Spearman correlation  
811 coefficient.

812 **(E)** Correlation of change in RPPA-derived protein levels between DDR-driven HRD positive  
813 tumors and HR competent tumors (plotted on x-axis), or HRD positive tumors of unknown  
814 aetiology and HR competent tumors (plotted on y-axis). Spearman correlation coefficient.

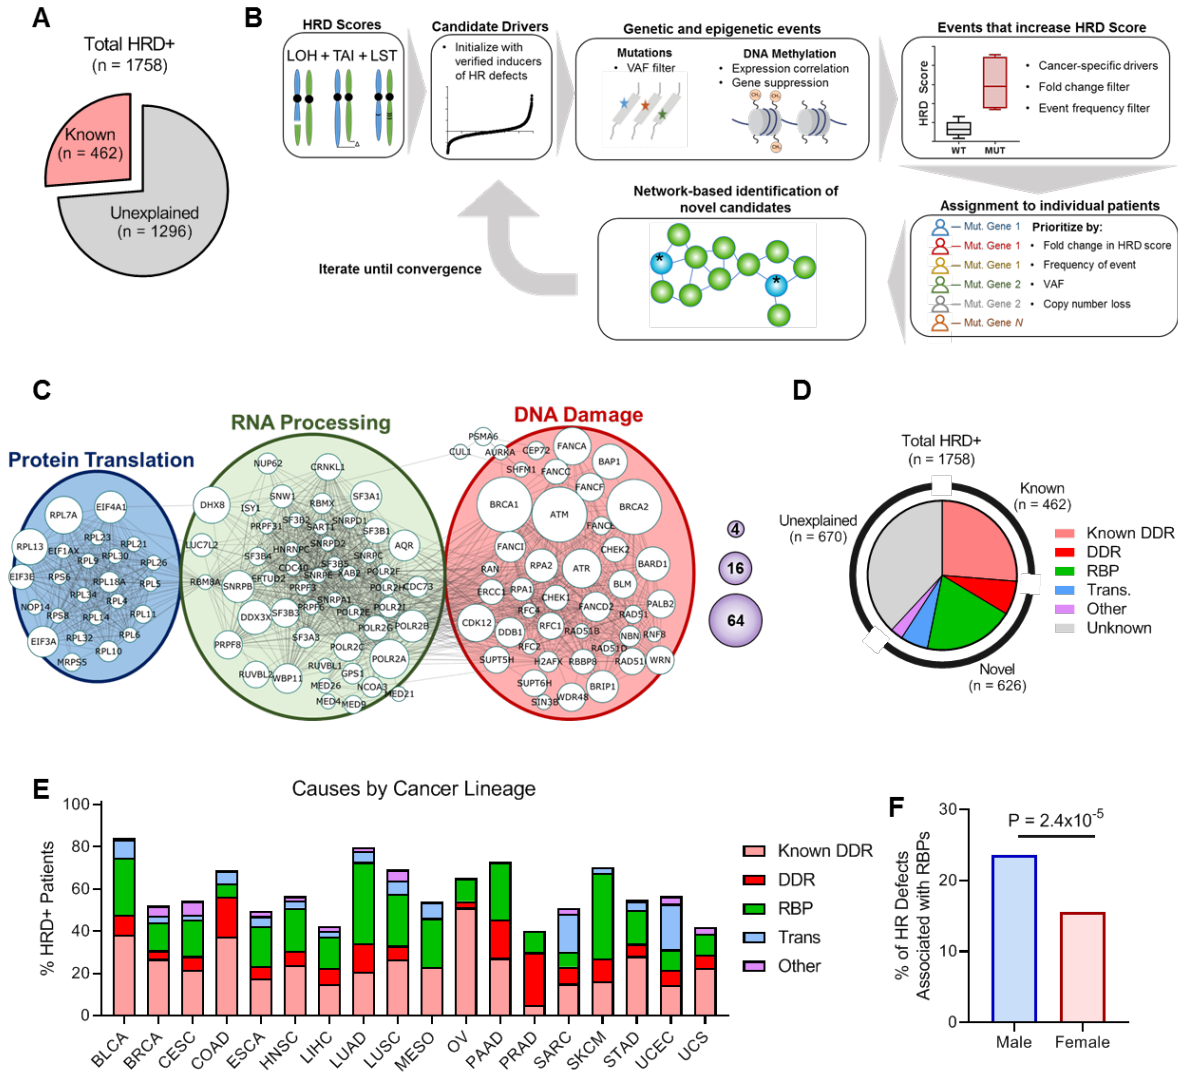

815

816 **Figure 3 | Discovery of novel drivers of HRD.**

817 (A) Pie chart showing the fraction of HRD positive (HRD+) tumors with known drivers of HRD  
818 and those with unknown drivers of HRD.

819 (B) Schematic of the network-driven pipeline used to discover novel drivers of HRD.

820 (C) Resulting protein network modules of identified drivers of HRD in tumors from patients with  
821 cancer. The size of nodes represents the number of patients with HRD attributed to a given gene,  
822 corresponding to the scale shown in the purple spheres.

823 **(D)** Pie chart showing the fractions of previously identified HRD drivers (light red) and newly  
824 identified putative drivers.

825 **(E)** Distribution of HRD driver ontologies by cancer type.

826 **(F)** Percentage of HR defects driven by RBPs in tumors from male and female patients with cancer.

827 Fisher's exact test.

828 See also Figure S2-S3 and Table S1.

829

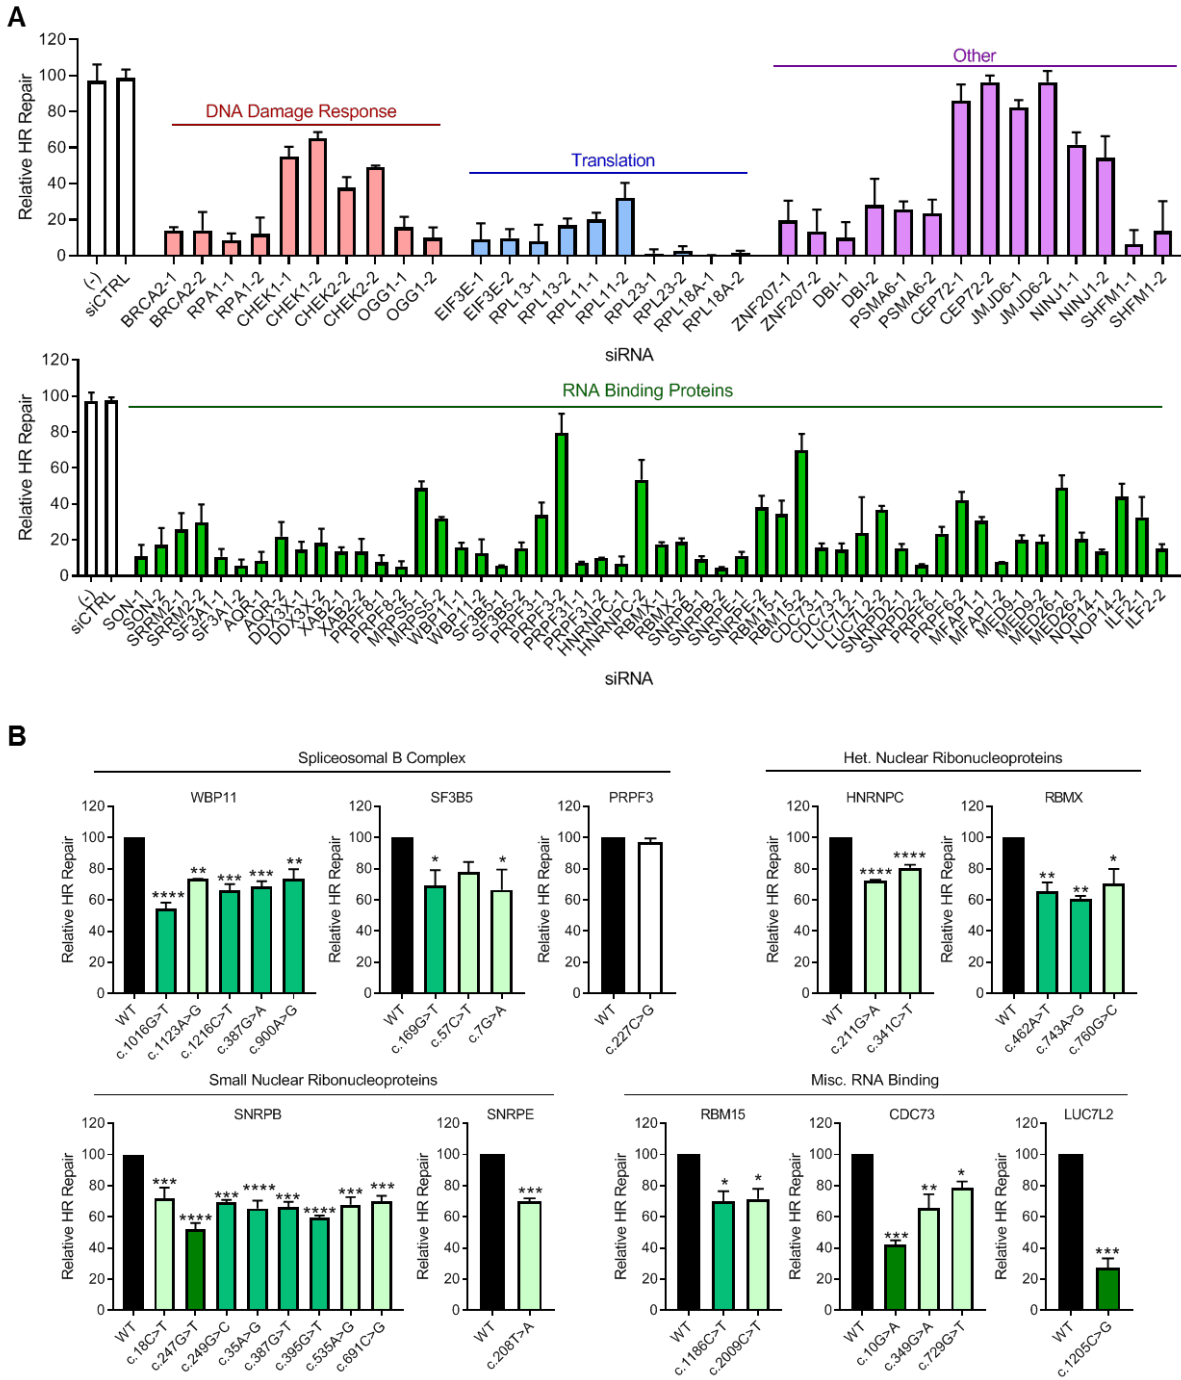

830

831 **Figure 4 | Validation of novel drivers of HR defects using flow cytometry-based DR-GFP**  
 832 **reporter assay.**

833 **(A)** HR repair was measured using a DR-GFP assay and flow cytometry to detect GFP in cell lines

834 following siRNA-mediated knockdown of each of the indicated genes. Relative HR repair is

835 defined relative to the percentage of GFP positive cells of untransfected and siCTRL-transfected  
836 controls. N = 3 per siRNA, 2 siRNAs per gene. Mean  $\pm$  s.e.m.

837 **(B)** The relative amount of HR repair was measured as in A. Cells were transfected with RFP-  
838 tagged wild-type (WT) or mutant protein-expressing constructs 24 hours prior to transfection with  
839 an I-SceI expression plasmid. HR repair was measured in RFP+ cells, and defined as mutant  
840 relative to WT overexpression. N = 3 per condition. Mean  $\pm$  s.e.m. ANOVA with Dunnett's post-  
841 hoc test. \* $p < .05$ , \*\* $p < 0.01$ , \*\*\* $p < 0.001$ , \*\*\*\* $p < 1 \times 10^{-4}$

842

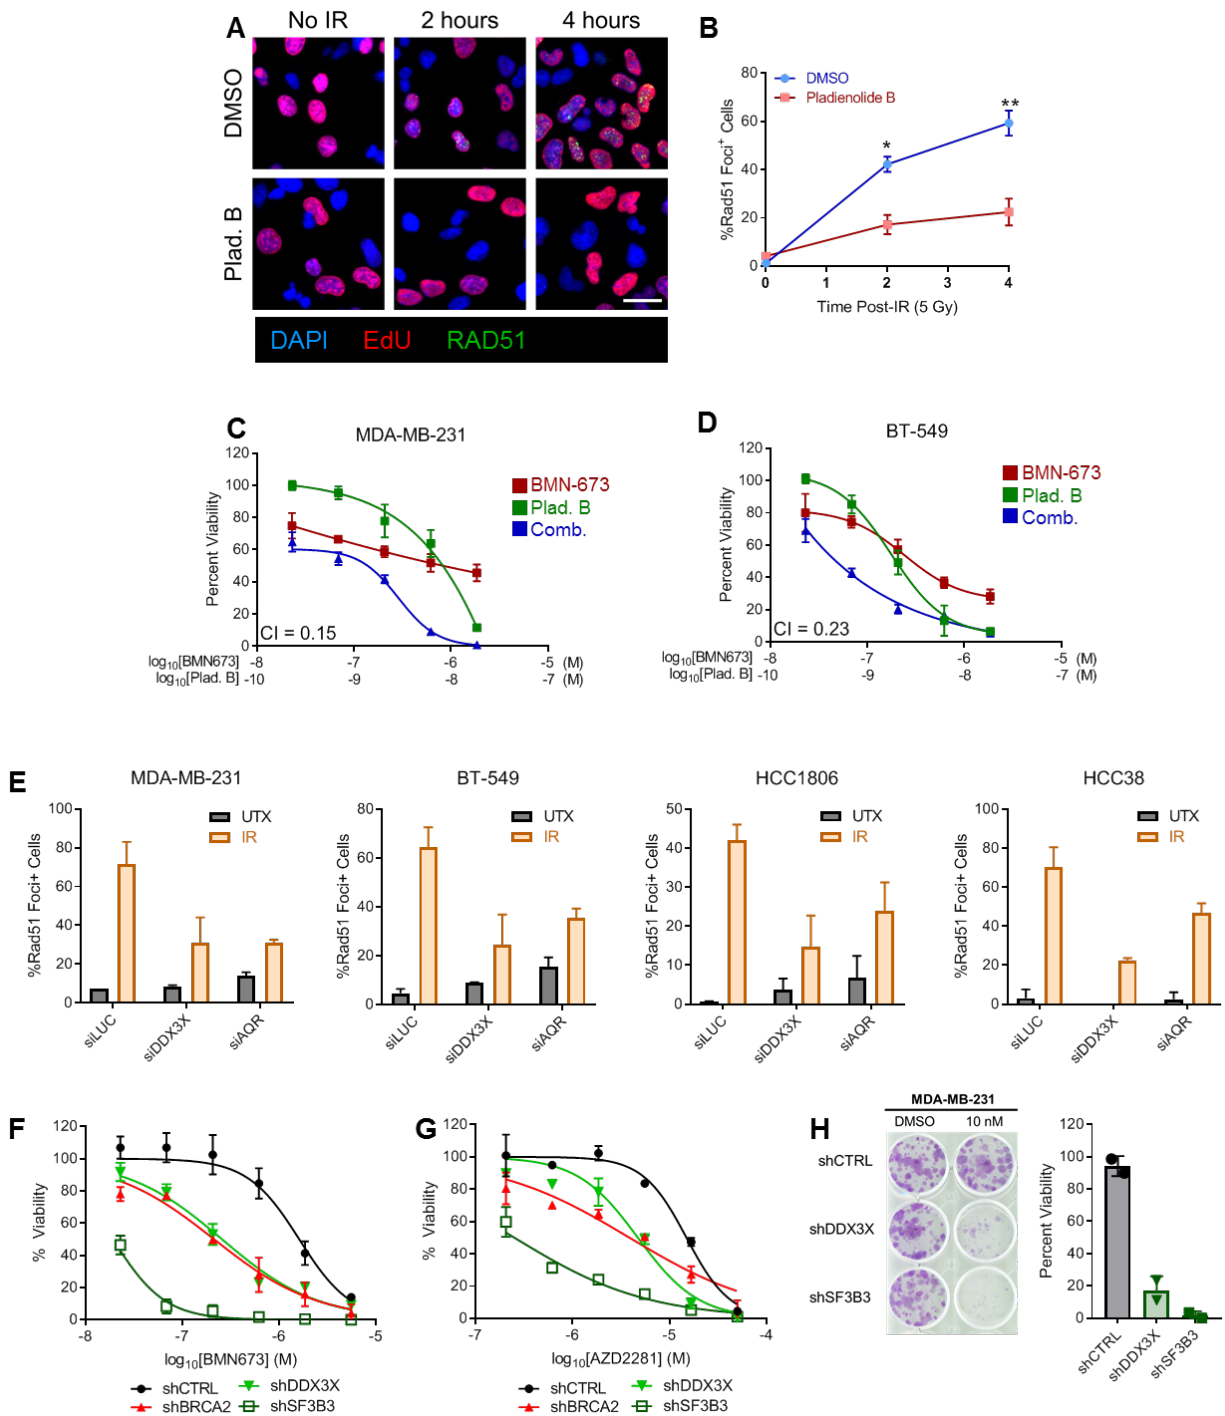

843

844 **Figure 5 | Control of HR by RNA binding proteins in breast cancer.**

845 (A) Images of cells treated with either 10 nM of the splicing inhibitor pladienolide B or a DMSO  
 846 vehicle control, 24 hours prior to irradiation (5 Gy). Images show Rad51 foci indicative of HR

847 repair (green), as well as proliferating (S phase) cells with EdU (red), and DAPI nuclear stain  
848 (blue).

849 **(B)** Quantification of percentage of cycling (EdU<sup>+</sup>) cells that exhibit Rad51 foci. N = 3. Student  
850 t-test. \*p<.05, \*\*p<0.01

851 **(C-D)** Viability of TNBC cells following a 5-day incubation with the splicing inhibitor  
852 pladienolide B (concentration indicated on top x-axis), PARP inhibitor BMN673 (concentration  
853 indicated on bottom x-axis), or a combination thereof, relative to a DMSO vehicle control for  
854 MDA-MB-231 cells (C) and BT-549 cells (D). Mean ± s.e.m. C.I.; Chou-Talalay combination  
855 index. N = 2.

856 **(E)** Quantification of IR-induced Rad51 foci in cycling (EdU<sup>+</sup>) TNBC cell lines following siRNA-  
857 mediated depletion of the indicated RBPs. N = 2 per cell line.

858 **(F)** Viability of individual MDA-MB-231 cell lines with stable single knockdowns of RBPs  
859 DDX3X and SF3B3, as well as HR protein BRCA2, following a 5-day treatment with BMN673.

860 **(G)** As in F but following a 5-day treatment with AZD2281.

861 **(H)** Clonogenic assay with MDA-MB-231 cells with stable knockdown of RBPs DDX3X and  
862 SF3B3, following a two-week treatment with BMN673. N = 2, points represent independent  
863 biological replicates.

864 See also Figure S4.



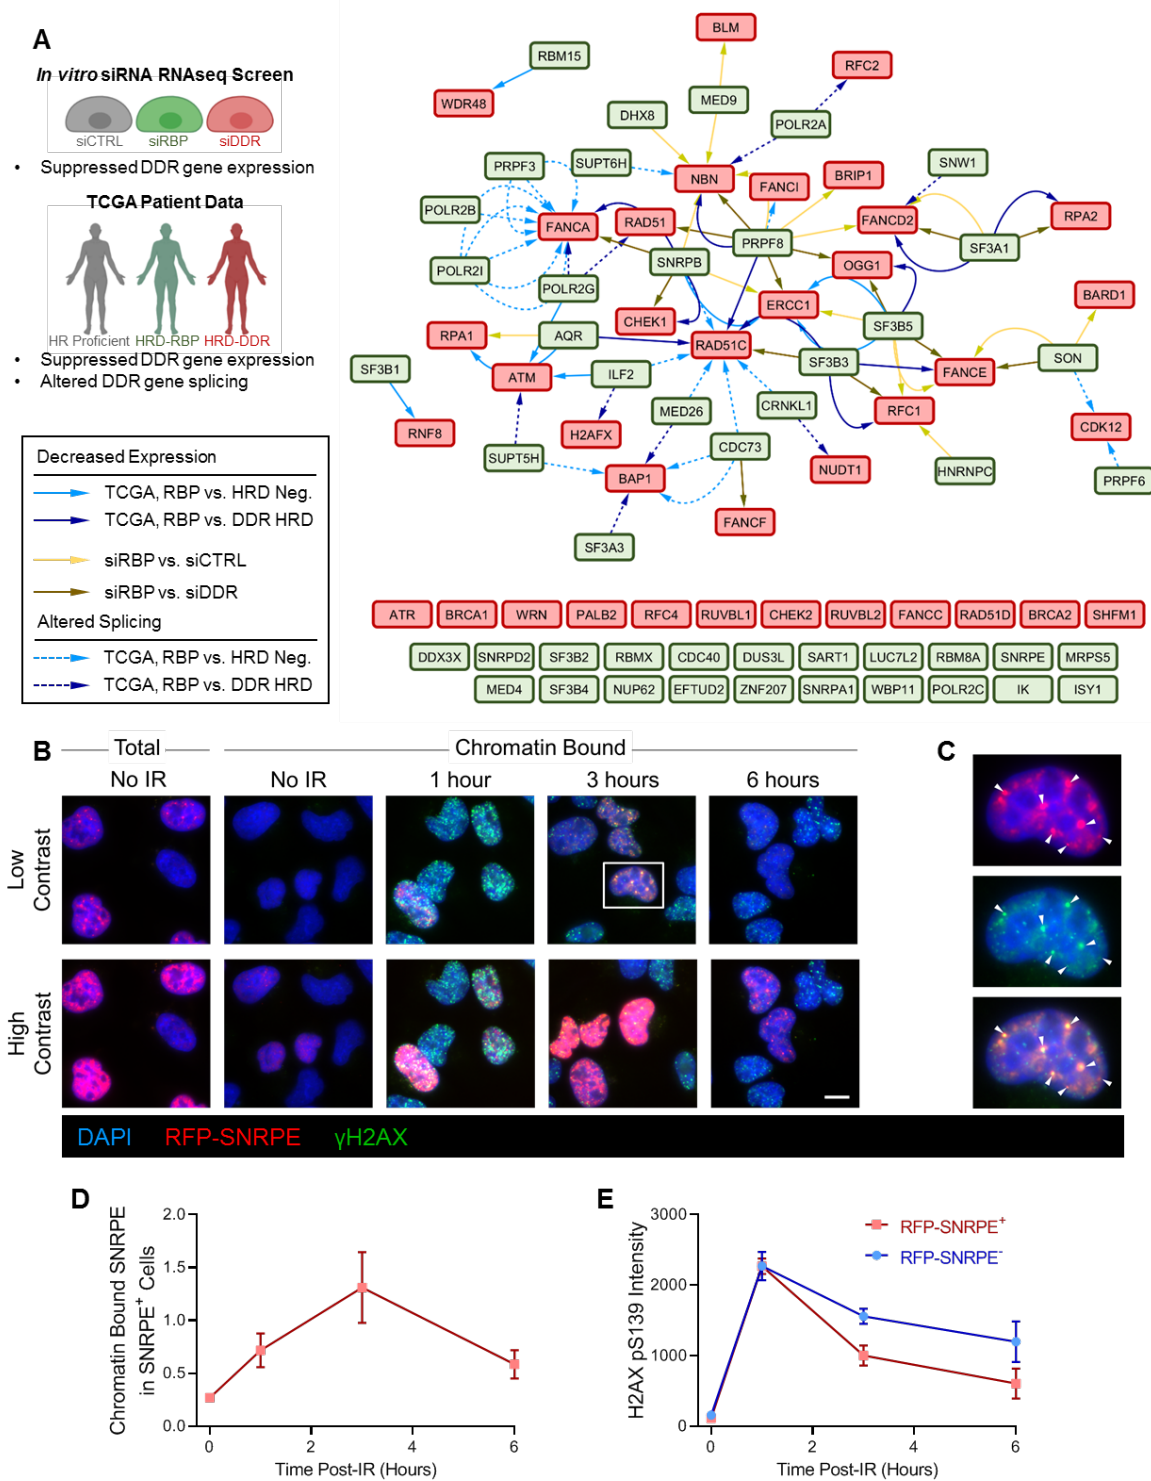

865

866 **Figure 6 | RNA binding proteins control HR repair by multiple mechanisms.**

867 (A) RBPs that can modulate DDR gene expression were identified through three approaches: (1)

868 *in vitro* RNA-seq screening following siRNA-mediated knockdown of selected (N = 17, Table S2)

869 pipeline-identified RBPs compared to either control siRNA (siCTRL) or siBRCA1 and siBRCA2  
870 (siDDR) in isogenic cell lines; (2) identification of down-regulated DDR genes expression levels  
871 in TCGA tumors with HRD driven by RBP loss compared to HR competent tumors or tumors with  
872 HRD driven by DDR loss; and (3) identification of alternatively spliced DDR genes in TCGA  
873 patient tumors with HRD driven by RBP loss compared to HR competent tumors or tumors with  
874 HRD driven by DDR loss. The network nodes indicate RBPs (green) identified to modulate DDR  
875 genes (red), with edges indicating how the modulation was identified. Genes listed across the  
876 bottom were not identified as being modulated by RBPs. The key for the network diagram, with  
877 solid arrows representing decreased expression and dotted arrows representing altered splicing, is  
878 on the left.

879 **(B)** IR-induced foci formation showing merged images of co-staining of RFP-SNRPE (red) and  
880  $\gamma$ H2AX (green). Total and chromatin-bound proteins prior to irradiation and chromatin-bound  
881 proteins at 1, 3, and 6 hours following irradiation (5 Gy). Scale bar = 10  $\mu$ m.

882 **(C)** Magnified image of boxed cell indicated in (B) showing single channel SNRPE (top) and  
883  $\gamma$ H2AX (middle), and the merged image (bottom). Arrows mark foci with co-localization of RFP-  
884 SNRPE and  $\gamma$ H2AX.

885 **(D)** Quantification of fluorescence signal due to chromatin-bound RFP-SNRPE in SNRPE<sup>+</sup> cells  
886 prior to and at 1, 3, and 6 hours following irradiation. Intensity is reported relative to the median  
887 total intensity in cells not subjected to extraction.

888 **(E)** Quantification of the fluorescence signal due to  $\gamma$ H2AX prior to and at 1, 3, and 6 hours  
889 following irradiation in RFP-SNRPE<sup>+</sup> and RFP-SNRPE<sup>-</sup> cells.

890 See also Figure S5-S6.

891

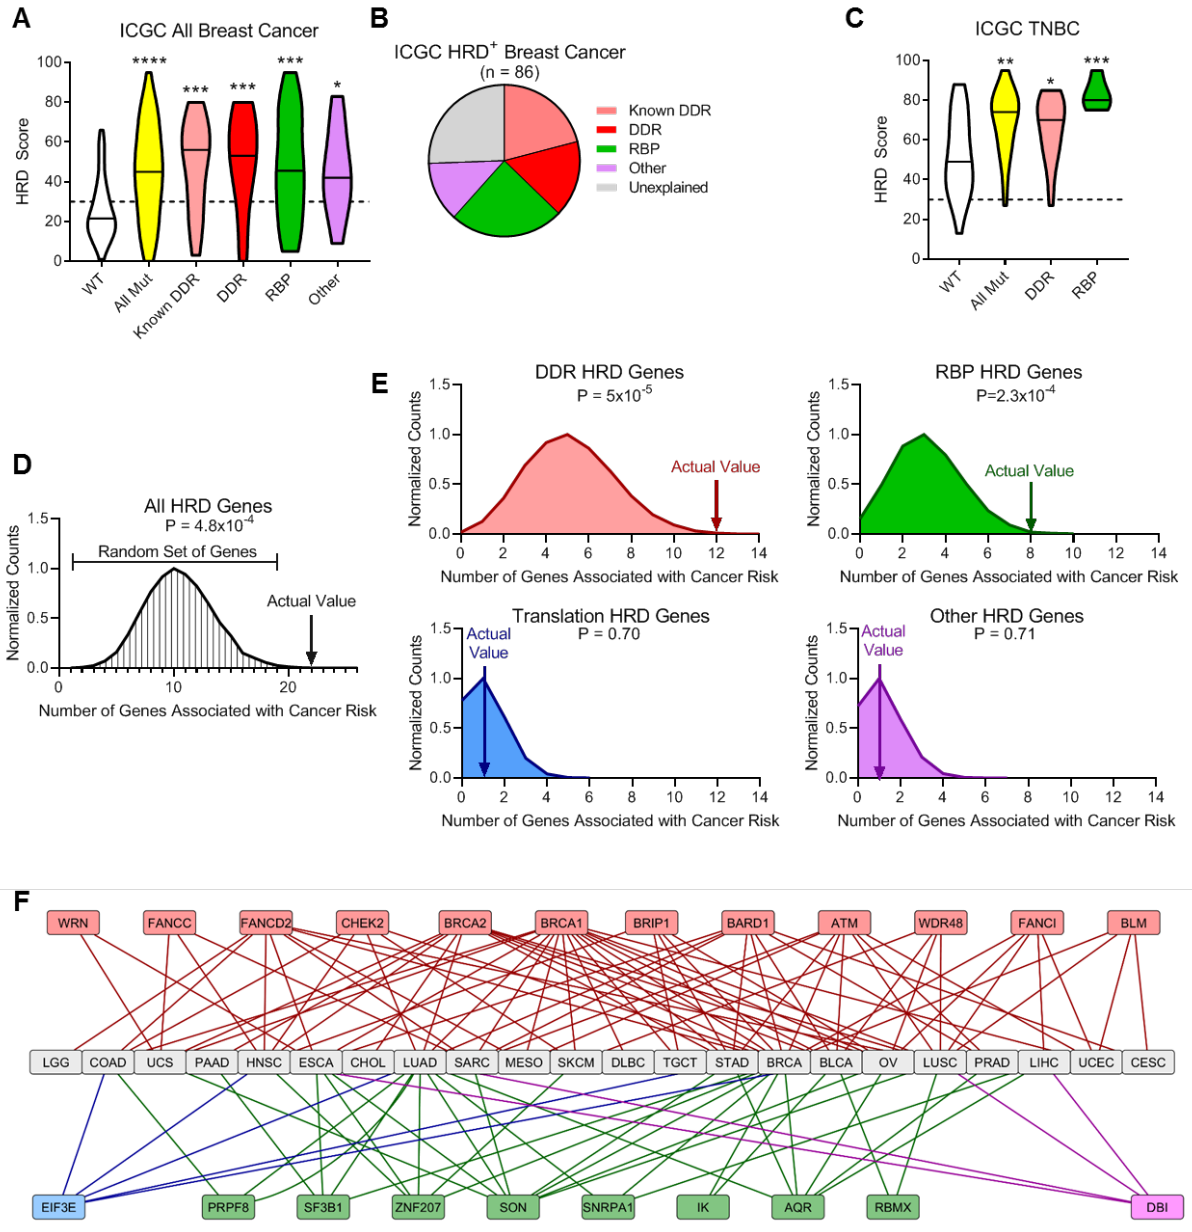

892

893 **Figure 7 | External validation of the involvement of RNA binding proteins in HR repair.**

894 (A) HRD scores were determined for an independent cohort of tumors from patients with breast  
 895 cancer from ICGC. Tumors were classified based on their candidate drivers into either Known  
 896 DDR (pink), novel DDR (red), RBP (green) or other (purple) genes. Kruskal-Wallis with Dunn's  
 897 posthoc comparing each group to WT.

898 **(B)** Pie chart showing the relative proportions of proposed causes of HRD defects in patient tumors  
899 from the ICGC cohort.

900 **(C)** HRD scores as in (A), but only showing tumors from TNBC patients. Kruskal-Wallis with  
901 Dunn's posthoc.

902 **(D)** Identified novel drivers of HR defects are enriched for genes associated with cancer risk from  
903 genome-wide association studies. The graph shows the distribution of number of genes associated  
904 with cancer risk using a random set of genes of equal size. The arrow indicates the actual observed  
905 number of genes associated with cancer risk. Empirical P value.

906 **(E)** Enrichment in genes associated with cancer risk as described in (D), but for individual gene  
907 ontologies.

908 **(F)** Network showing genes identified from the GWAS studies associated with cancer risk as well  
909 as the cancer types where mutations in those genes were identified as causing an HR defect. DDR  
910 genes (red), RBP genes (green), translation genes (blue), and other (purple).

911 \* $p < .05$ , \*\* $p < 0.01$ , \*\*\* $p < 0.001$ , \*\*\*\* $p < 1 \times 10^{-4}$

912

913

914 SUPPLEMENTAL FIGURES

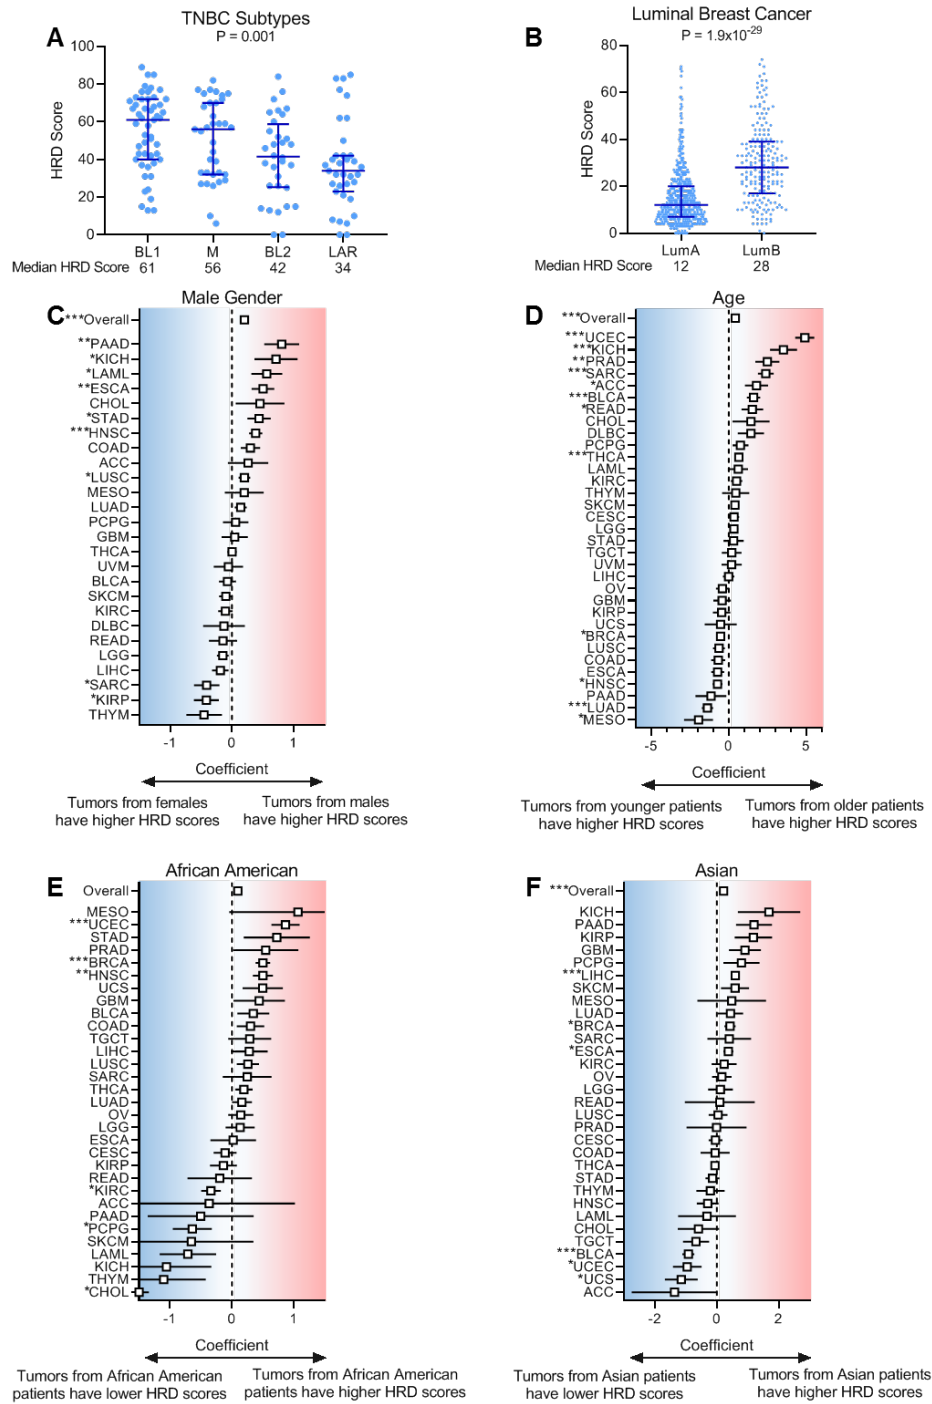

915

916 Figure S1 | Demographics of HR defects, Related to Figure 1.

917 **(A)** HRD score for specific TNBC subtypes, shown as median with interquartile range. Basal-like  
918 1 (BL1), metastatic (M), basal-like 2 (BL2), luminal-androgen receptor (LAR). Kruskal-Wallis  
919 test.

920 **(B)** HRD score in luminal A (LumA) and luminal B (LumB) breast cancer, shown as the median  
921 with interquartile range. Rank-sum test.

922 **(C-F)** Regression coefficients for HRD score with the indicated demographic information. The  
923 overall regression coefficient was determined using a generalized, linear mixed model with tumor  
924 type as a random effect. (C) Positive coefficient indicates HRD score is higher in tumors from  
925 male patients with cancer. (D) Positive coefficient indicates HRD score increases in tumors from  
926 patients of older age. (E) Positive coefficient indicates HRD score is increased in tumors from  
927 African American patients with cancer. (F) Positive coefficient indicates HRD score is increased  
928 in tumors from Asian patients with cancers. \* $p < 0.05$ , \*\* $p < 0.01$ , \*\*\* $p < 0.001$ .

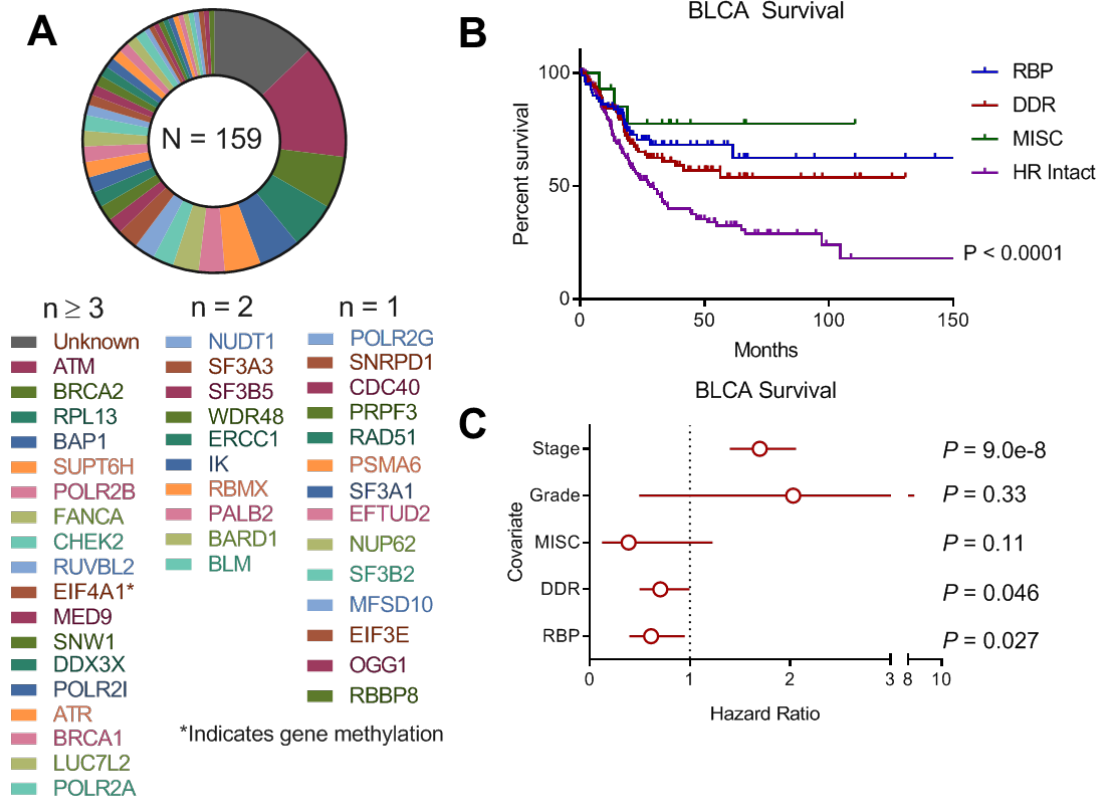

929

930

931 **Figure S2 | Survival of patients with bladder cancer by type of HR defect, Related to Figure**

932 **3.**

933 **(A)** Genes identified as putative causes of HR defects in tumors from patients with bladder cancer.

934 **(B)** Kaplan-Meier curves showing overall survival of bladder cancer patients, stratified by general

935 type of putative HR defect compared to patients with HR competent tumors. Log-rank test to assess

936 survival differences.

937 **(C)** Multivariate survival analysis with Cox proportional hazards model.

938

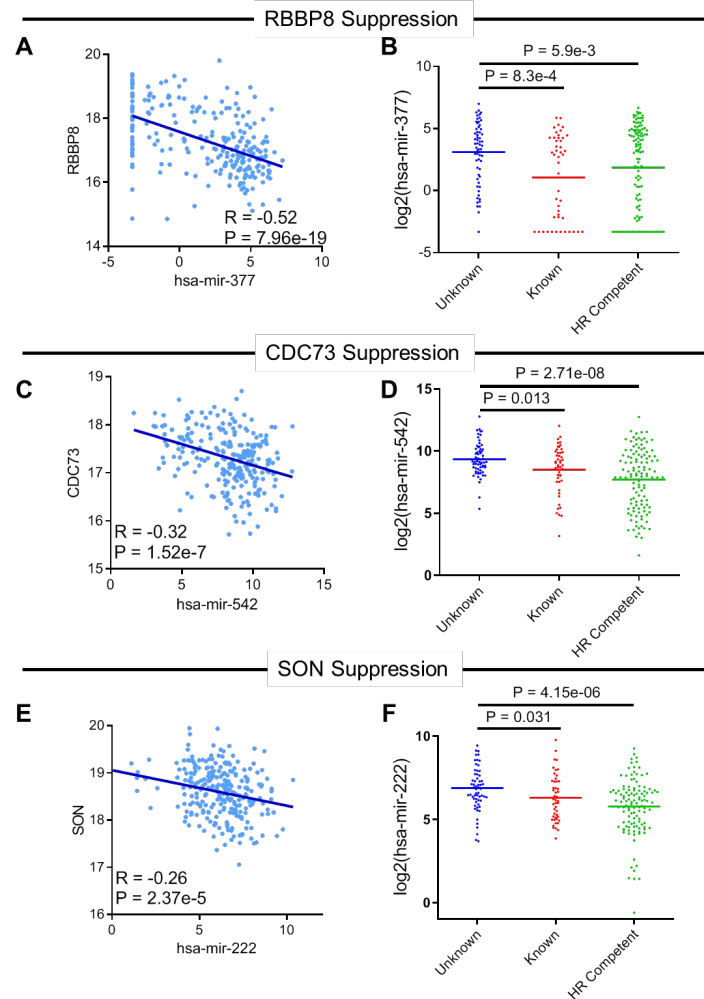

939

940

941 **Figure S3 | MicroRNA control of HR defects in sarcoma, Related to Figure 3.**

942 **(A)** Scatter plot showing an inverse correlation between RBBP8 and hsa-mir-377 expression.

943 Spearman correlation coefficient.

944 **(B)** Differential expression of hsa-mir-377 in tumors with HRD of unknown cause, HRD in which

945 a candidate driver could be identified, and HR-competent tumors. Kruskal-Wallis with Dunn's

946 posthoc test.

947 **(C)** Scatter plot showing an inverse correlation between CDC73 and hsa-mir-543 expression.

948 Spearman correlation coefficient.



949 **(D)** Differential expression of hsa-mir-543 in tumors with HRD of unknown cause, HRD in which  
950 a candidate driver could be identified, and HR-competent tumors. Kruskal-Wallis with Dunn's  
951 posthoc test.

952 **(E)** Scatter plot showing an inverse correlation between SON and hsa-mir-222 expression.  
953 Spearman correlation coefficient.

954 **(F)** Differential expression of hsa-mir-222 in tumors with HRD of unknown cause, HRD where a  
955 candidate driver could be identified, and HR-competent tumors. Kruskal-Wallis with Dunn's  
956 posthoc test.

957

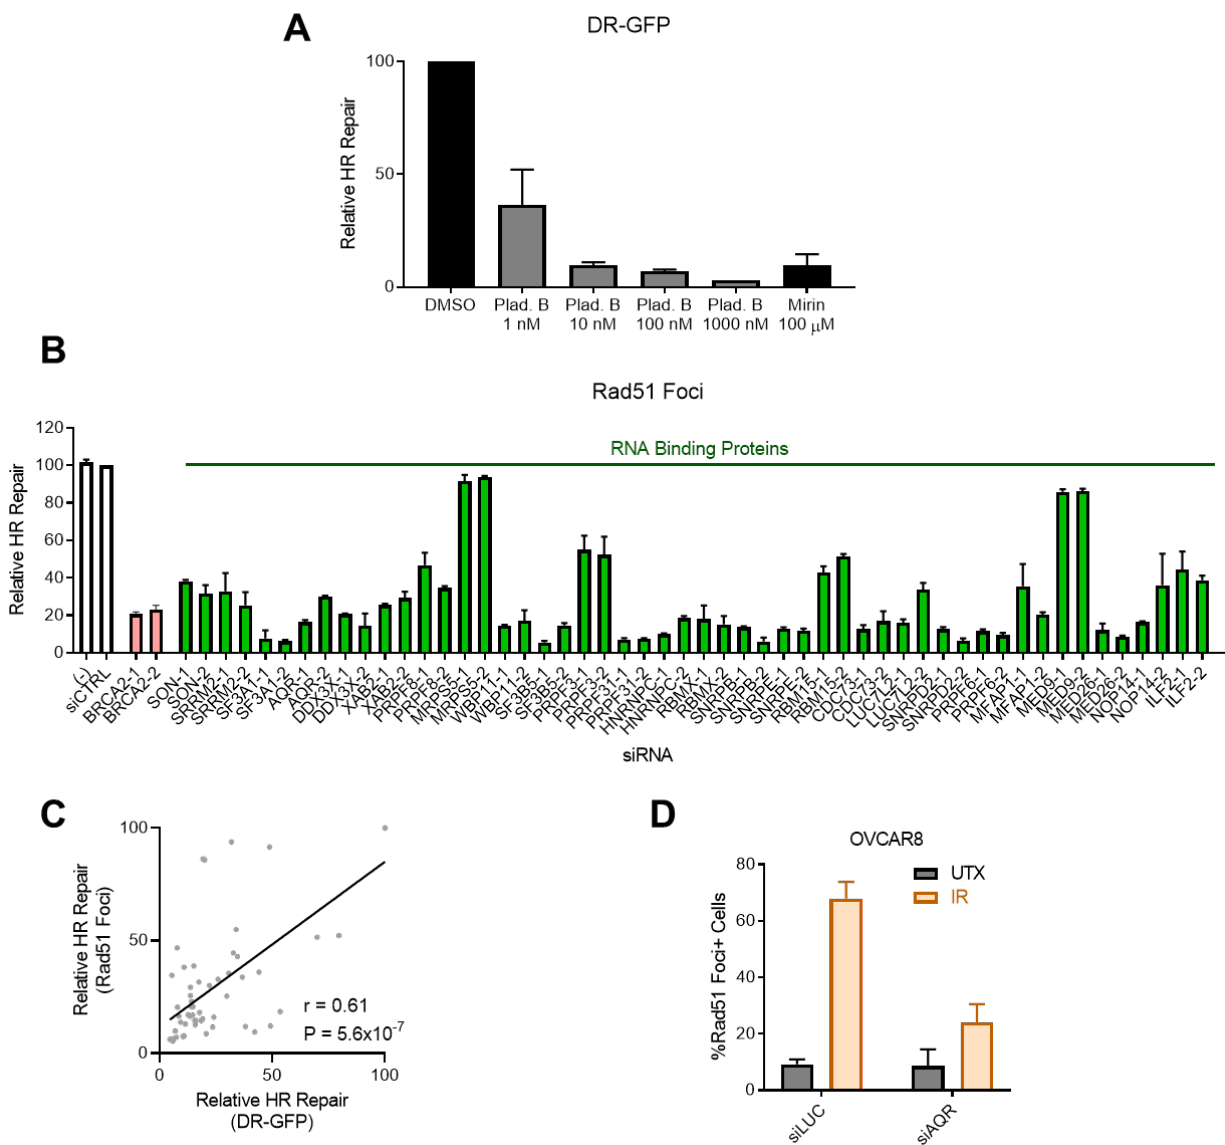

958

959 **Figure S4 | HR defects associated with loss of RBPs, Related to Figure 3.**

960 **(A)** A DR-GFP HR reporter system was used to measure HR in U2OS cells treated with the  
 961 indicated concentrations of the spliceosome inhibitor pladienolide B, the Mre11–Rad50–Nbs1  
 962 (MRN) inhibitor Mirin, or a DMSO vehicle control.

963 **(B)** Quantification of IR-induced Rad51 foci in cycling (EdU<sup>+</sup>) U2OS cells following siRNA-  
 964 mediated depletion of the indicated RBPs. Reported as repair relative to control siRNA (siCTRL).  
 965 N = 2 per cell line.

966 **(C)** Correlation between relative HR repair by DR-GFP (Figure 4A) and by Rad51 foci in EdU<sup>+</sup>  
967 cells (Figure S4B). Pearson correlation coefficient.

968 **(D)** Quantification of IR-induced Rad51 foci in cycling (EdU<sup>+</sup>) OVCAR8 ovarian cancer cells  
969 following siRNA-mediated depletion of AQR or siLuciferase (siLUC) control. Reported as repair  
970 relative to control siRNA. N = 2 per cell line.

971

972

973

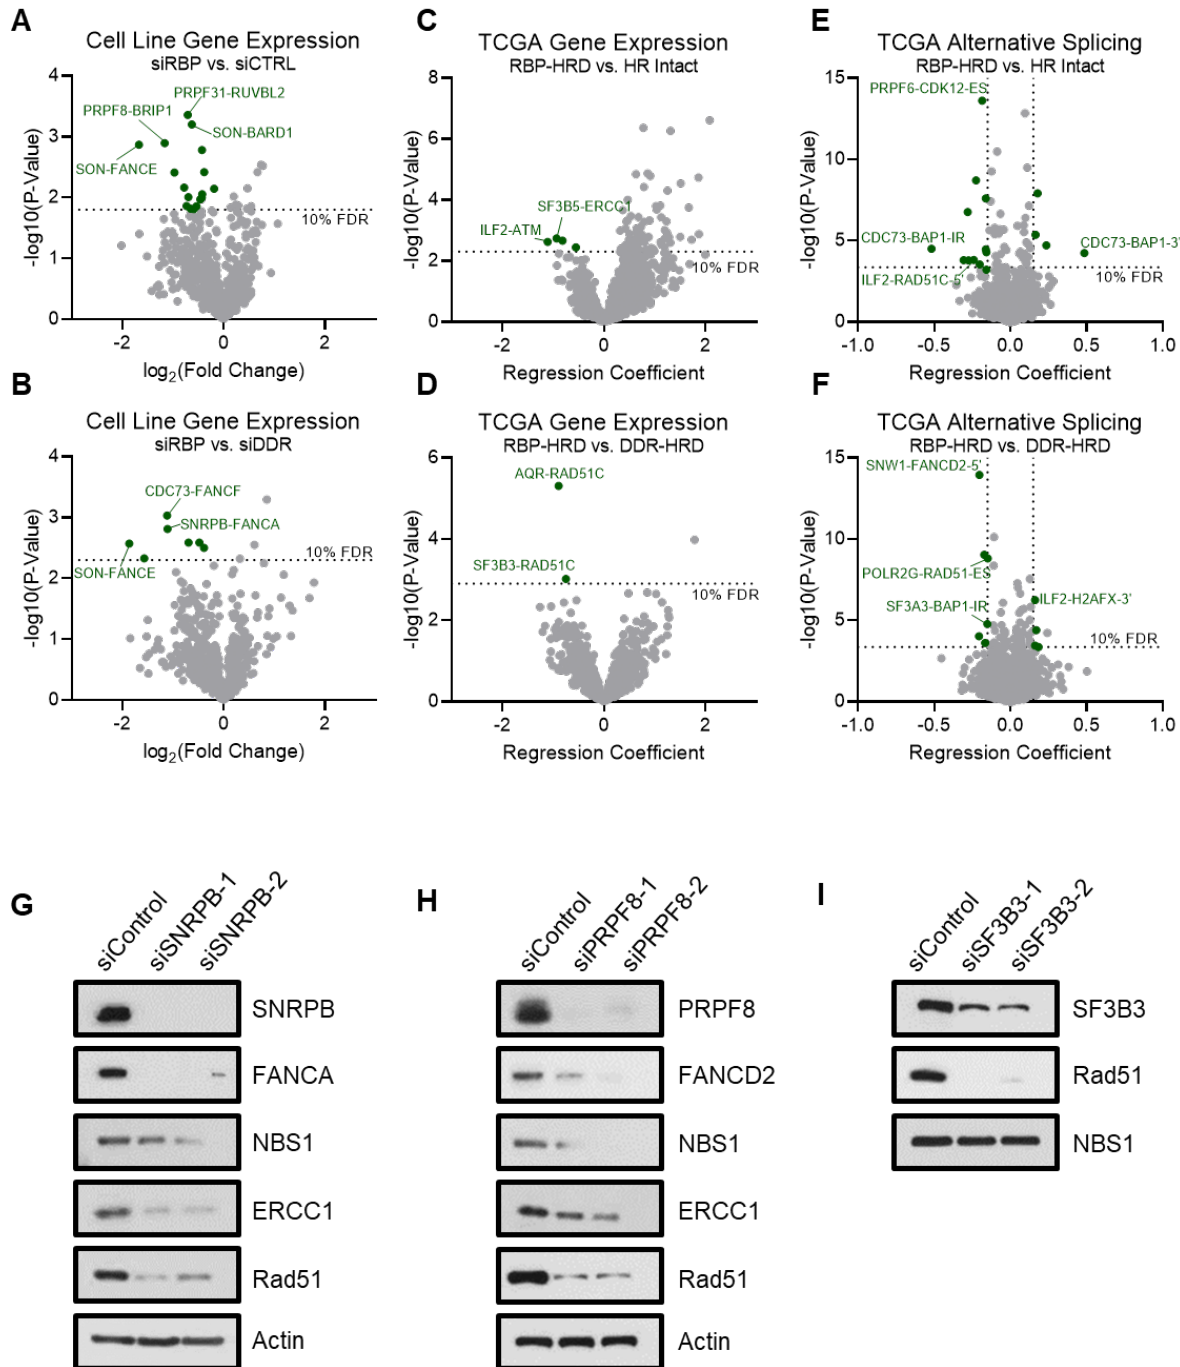

974

975 **Figure S5 | Control of DDR gene expression and splicing by RBPs, Related to Figure 5.**

976 Volcano plots showing genes that are either suppressed or alternatively spliced upon RBP loss.

977 Genes reaching statistically significant changes are highlighted in green. Annotations are listed as

978 “RBP Gene”-“DDR Gene,” for example, SON-FANCE in panel A indicates SON loss reduces  
979 expression of FANCE.

980 **(A)** DDR gene expression in cells with RBP expression knocked down using siRNA (siRBPs)  
981 compared with an siRNA negative control (siCTRL) in U2OS, MDA-MB-231, and BT-549 cell  
982 lines. RNA-seq was performed in duplicate for each cell line and averaged after log transformation.  
983 Significance was determined using a paired t-test with the FDR determined by the method of  
984 Storey.

985 **(B)** DDR gene expression in cells with RBP expression knocked down using siRNAs (siRBPs)  
986 compared with knock-down of BRCA1 and BRCA2 with siRNA (siDDR) in U2OS, MDA-MB-  
987 231, and BT-549 cell lines. RNA-seq was performed in duplicate for each cell line and averaged  
988 after log transformation. Significance was determined using a paired t-test with the FDR  
989 determined by the method of Storey.

990 **(C)** DDR gene expression in TCGA patient tumors with HRD attributed to loss of RBPs compared  
991 to HR competent-patient tumors using a generalized linear mixed model with tumor type as a  
992 random effect. The FDR was determined by the method of Storey.

993 **(D)** DDR gene expression in TCGA patient tumors with HRD caused by RBP aberrations  
994 (mutation or methylation) compared to HRD caused by aberrations DDR gene aberrations  
995 determined using a generalized linear mixed model with tumor type as a random effect. The FDR  
996 was determined by the method of Storey.

997 **(E)** Alternative splicing of DDR genes in TCGA patient tumors with HRD putatively caused by  
998 RBP aberrations (mutation or methylation) compared to tumors from HR-competent patients using  
999 a generalized linear mixed model with tumor type as a random effect. The FDR was determined  
1000 by the method of Storey.

1001 **(F)** Alternative splicing of DDR genes in TCGA patient tumors with HRD putatively caused by  
1002 RBP aberrations (mutation or methylation) compared to HRD caused by DDR gene aberrations  
1003 determined using a generalized linear mixed model with tumor type as a random effect. The FDR  
1004 was determined by method of Storey.

1005 **(G)** Validation of depletion of SNRPB causing loss of canonical HR genes FANCA, NBS1,  
1006 ERCC1, and Rad51 identified in Figure 6A/S5A-F at the protein level by western blot in BT-549  
1007 triple-negative breast cancer cells.

1008 **(H)** Validation of depletion of PRPF8 causing loss of canonical HR genes FANCD2, NBS1,  
1009 ERCC1, and Rad51 identified in Figure 6A/S5A-F at the protein level by western blot in BT-549  
1010 triple-negative breast cancer cells.

1011 **(I)** Validation of depletion of SF3B3 causing loss of canonical HR gene Rad51 identified in Figure  
1012 6A/S5A-F at the protein level by western blot in BT-549 triple-negative breast cancer cells.

1013

1014

1015

1016

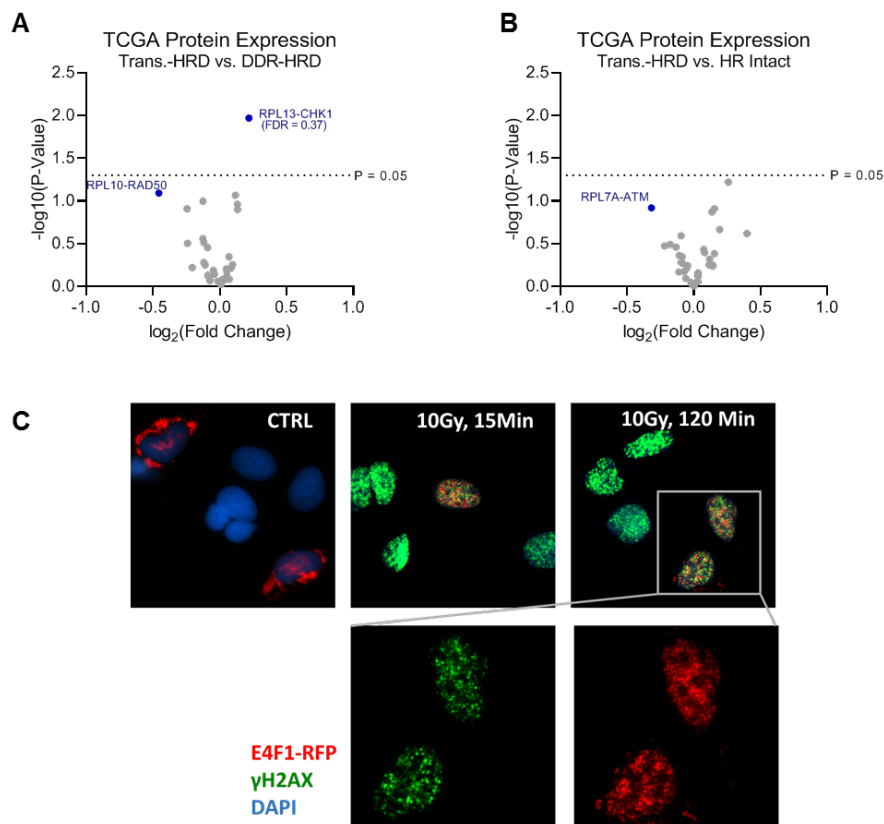

1017

1018 **Figure S6 | Control of DDR protein expression by translation genes, Related to Figure 5.**

1019 **(A)** DDR protein expression based on RPPA data for TCGA patient tumors with HRD putatively  
1020 caused by aberrations in translation genes (Trans.-HRD) compared to tumors from HR-competent  
1021 patients using a generalized linear mixed model with tumor type as a random effect. FDR  
1022 determined by Benjamini–Hochberg procedure. Annotations are listed as “Translation Gene”-  
1023 “DDR Gene”.

1024 **(B)** Comparison of DDR protein expression based on RPPA data for TCGA patient tumors with  
1025 HRD putatively caused by aberrations (mutation or methylation) in translation genes compared to  
1026 HRD caused by aberrations in DDR genes determined using a generalized linear mixed model  
1027 with tumor type as a random effect. FDR determined by Benjamini–Hochberg procedure.  
1028 Annotations are listed as “Translation Gene”-“DDR Gene”.

1029 (C) IR-induced foci of translation factor E4F1-RFP, with co-staining for DNA double-strand  
1030 break marker  $\gamma$ H2AX. Soluble protein was extracted prior to fixation.

1031

1032
